# Supplementary material for: PpSAUR5 promotes plant growth by regulating lignin and hormone pathways
Source: Front Plant Sci. 2024 Jun 25;15:1291693. doi: 10.3389/fpls.2024.1291693 (PMC11231374; doi:10.3389/fpls.2024.1291693)
Supplement: Supplementary file 5 [file Table_3.xlsx]

## Sheet: Sheet1
Supplemental Table S3: Differentially expressed genes
#ID	gene_name	CK-1_FPKM	CK-2_FPKM	CK-3_FPKM	SAUR5-8-1_FPKM	SAUR5-8-2_FPKM	SAUR5-8-3_FPKM	FDR	log2FC	regulated
AT4G15340	AT4G15340	0.434761	0.536739	0.605587	1.4217	2.38775	0.953287	0.000379907	1.22086	up
AT1G18100	AT1G18100	2.93972	3.10703	3.68993	7.95255	10.3732	11.8841	3.27479e-15	1.51382	up
AT1G53340	AT1G53340	0.494755	0.338288	0.580512	0.84201	2.82137	1.31685	0.00186853	1.21759	up
AT4G01870	AT4G01870	34.9572	43.931	56.0827	20.4588	24.0674	18.0194	8.81699e-08	-1.02985	down
AT5G26260	AT5G26260	18.7318	8.70292	11.3192	26.5885	89.2214	51.8044	1.93051e-05	1.51284	up
AT5G04960	AT5G04960	2.2963	1.30023	1.55772	7.6081	25.903	15.5356	6.99939e-13	2.36516	up
AT1G34510	AT1G34510	1.56713	0.751676	1.4671	6.23693	25.6317	15.2199	4.42111e-12	2.42299	up
AT2G43880	AT2G43880	0.668171	0.306835	0.292132	0.930948	3.05166	1.41495	0.00403513	1.20151	up
AT2G39250	AT2G39250	15.819	19.2946	16.0461	6.03379	3.05136	6.46382	3.93544e-07	-1.44073	down
AT1G33750	AT1G33750	1.01638	0.542143	0.596497	1.82977	4.76215	2.20477	0.000100558	1.41907	up
AT5G19790	AT5G19790	0.925974	0.66462	0.809407	2.03018	7.65711	5.6185	1.0866e-06	1.77442	up
AT2G18210	AT2G18210	0.321596	0.505229	0.562037	1.37371	3.72323	1.62026	9.19353e-05	1.48816	up
AT1G74458	AT1G74458	5.78078	5.57514	6.15967	9.7688	15.8861	13.401	5.97647e-06	1.04135	up
AT5G43230	AT5G43230	0.202124	0.375059	0.14488	0.448237	1.35011	0.683577	0.0097915	1.08702	up
AT4G32280	AT4G32280	1.7274	1.448	1.16536	3.57997	4.18348	7.49654	1.59374e-05	1.40778	up
AT1G73580	AT1G73580	0.695116	0.306496	0.352186	2.18729	7.27954	5.5083	8.16396e-08	2.01508	up
AT4G21850	AT4G21850	10.8162	9.01157	15.3648	16.1076	49.3604	23.2784	0.00526231	1.01319	up
AT3G04720	AT3G04720	197.363	232.662	277.247	622.192	1261.02	472.316	2.60252e-06	1.41876	up
AT3G56200	AT3G56200	16.1866	16.0539	20.3858	47.5321	28.936	41.6337	2.60348e-06	1.06735	up
AT5G64100	AT5G64100	19.0604	13.7608	19.966	32.582	90.9743	39.231	0.00012624	1.26831	up
AT5G60660	AT5G60660	3.69791	3.35233	2.40782	8.65428	16.9444	12.5315	1.25749e-09	1.67831	up
AT4G38860	AT4G38860	56.7029	51.3234	49.3713	8.20138	8.98964	19.1343	2.38553e-09	-1.74378	down
AT3G44260	AT3G44260	5.09164	3.01153	7.25417	12.6593	31.0758	12.3572	0.000130281	1.36774	up
AT3G23240	AT3G23240	0.694441	0.438718	0.860541	2.30058	5.24929	2.38231	5.62423e-06	1.62069	up
AT4G23220	AT4G23220	0.81784	0.824443	0.606535	2.07017	3.155	2.32949	2.72778e-09	1.51083	up
AT1G02310	AT1G02310	0.245174	0.332663	0.456378	1.17636	0.788254	0.745347	0.00713468	1.01851	up
AT1G05680	AT1G05680	7.25377	9.52859	13.6123	5.3625	3.6135	2.7946	0.000216519	-1.12349	down
AT3G17600	AT3G17600	0.367025	0.257319	0.540889	1.08926	2.16542	1.09993	0.00194544	1.22915	up
AT5G37540	AT5G37540	3.52653	3.52107	4.53119	9.22484	11.3248	8.9786	4.46529e-15	1.28161	up
AT4G25820	AT4G25820	7.72885	4.84182	7.25456	23.8476	79.0071	46.6224	4.25913e-12	2.20825	up
AT1G32540	AT1G32540	3.77797	3.9735	3.63034	6.6266	10.4714	10.5781	3.36163e-07	1.10017	up
AT4G30850	AT4G30850	2.99997	2.608	2.61027	4.78198	8.55287	6.51886	4.01404e-06	1.15502	up
AT2G20520	AT2G20520	1.11697	1.03624	0.557398	4.96224	17.1681	11.3295	3.91899e-12	2.42026	up
AT2G44500	AT2G44500	7.75444	7.93913	13.393	19.9087	36.0652	18.6577	7.79915e-05	1.15088	up
AT3G54590	AT3G54590	1.1824	1.17324	2.0219	5.14691	27.0088	12.2734	1.27034e-09	2.18311	up
AT3G55230	AT3G55230	5.3305	3.80655	4.24297	8.71399	16.4864	10.5709	1.11821e-05	1.20733	up
AT2G41230	AT2G41230	8.79775	10.7796	15.0573	24.6568	24.6486	33.5751	7.62819e-07	1.14409	up
AT3G44326	AT3G44326	0.788115	0.436549	0.930084	1.524	2.6716	1.52325	0.0045919	1.0482	up
AT2G38470	AT2G38470	7.36872	7.07688	13.297	25.5716	35.4381	19.9679	1.44293e-06	1.32859	up
AT5G60520	AT5G60520	1.45699	1.07759	1.04233	2.50846	7.88683	2.97823	0.000604169	1.30057	up
AT1G08430	AT1G08430	1.81034	1.94818	3.43119	4.54375	11.0252	6.67907	0.000105188	1.28308	up
AT4G12050	AT4G12050	0.661448	0.585683	0.341648	1.58002	3.52059	2.47548	1.44293e-06	1.64707	up
AT5G42180	AT5G42180	3.50331	2.52257	3.14736	5.94113	13.964	6.98865	0.000113111	1.23616	up
AT1G65490	AT1G65490	32.3455	37.9722	38.0117	106.124	111.38	136.281	6.84896e-30	1.63537	up
AT4G39830	AT4G39830	0.358473	0.368432	0.542377	1.27869	2.41572	1.07391	2.06458e-05	1.44382	up
Arabidopsis_thaliana_newGene_710	--	2.88932	2.65829	2.82114	0	0	0	3.53365e-59	-5.04207	down
AT4G26320	AT4G26320	1.81	0.737632	0.695512	3.6567	8.96815	6.04079	6.55689e-05	1.54483	up
AT3G23870	AT3G23870	0.381819	0.230074	0.19397	0.841696	1.6727	1.40688	1.12925e-05	1.57561	up
AT3G60330	AT3G60330	1.03769	1.20354	1.37149	3.54441	11.2582	6.29296	3.54454e-10	1.97153	up
AT3G22360	AT3G22360	2.17471	1.57707	1.76026	0.099219	0.150202	0.074869	6.12808e-17	-2.76661	down
AT4G19030	AT4G19030	3.56353	2.01748	2.10055	6.10009	12.5403	7.11972	3.13151e-05	1.35762	up
AT3G03480	AT3G03480	0.163597	0.235354	0.070877	1.78599	0.885543	0.674316	0.000111147	1.54633	up
AT1G80160	AT1G80160	0.777342	1.09427	1.04597	6.44859	3.25206	1.41007	0.00402799	1.18724	up
AT2G25980	AT2G25980	3.42734	2.05543	2.56785	7.69839	24.2954	10.9542	1.57485e-07	1.77115	up
AT1G19530	AT1G19530	1.33129	1.42558	1.77813	3.49771	10.9105	3.57381	0.000576811	1.32608	up
AT1G13700	AT1G13700	2.2647	2.81608	2.67099	4.92985	8.38168	6.30937	1.30328e-06	1.18479	up
AT5G48570	AT5G48570	25.2011	45.7498	60.6792	15.7239	13.1871	18.9831	1.67973e-05	-1.22399	down
AT2G29620	AT2G29620	0.162908	0.135047	0.144946	0.821199	2.00804	1.1487	5.33454e-12	2.28209	up
AT5G02200	AT5G02200	0.517855	0.19871	0.159222	1.39326	1.61244	1.13305	0.00140676	1.28268	up
AT3G25240	AT3G25240	0.036591	0.488106	0.262476	1.4768	1.51523	1.68544	0.00222411	1.28569	up
AT1G26790	AT1G26790	5.52041	4.82661	4.3154	1.77571	1.80562	2.11501	1.50427e-08	-1.24772	down
AT1G22065	AT1G22065	4.42869	2.88252	4.32698	7.27578	9.97304	8.59603	7.3403e-05	1.01474	up
AT2G30230	AT2G30230	10.9249	8.00701	9.28105	19.6474	21.1797	18.9038	2.87853e-08	1.01163	up
AT1G62980	AT1G62980	2.50875	1.73299	2.22116	7.51018	30.7217	14.4781	1.33e-09	2.1031	up
AT3G50060	AT3G50060	6.74801	5.23959	7.18417	16.2544	16.5393	16.1833	6.59325e-16	1.287	up
AT5G51190	AT5G51190	2.11861	0.929042	3.34671	4.58718	15.1993	4.47219	0.00731358	1.13515	up
AT1G08340	AT1G08340	1.34359	0.871188	0.698741	1.63777	3.84284	2.78299	0.00347585	1.08589	up
AT5G16900	AT5G16900	0.220558	0.253761	0.342502	0.402145	1.483	0.810983	0.00573815	1.12145	up
AT3G29780	AT3G29780	1.90444	1.15096	1.5878	2.7582	6.234	4.05693	0.00396602	1.08387	up
AT4G25220	AT4G25220	0.793739	0.430067	0.701609	2.53433	8.47219	3.78755	9.22071e-09	2.0163	up
AT4G11280	AT4G11280	6.98334	5.09696	8.28021	14.5046	19.2275	13.2849	1.26435e-06	1.09612	up
AT1G79330	AT1G79330	0.373647	0.52921	0.463963	0.7392	1.86594	1.35021	0.00508905	1.07731	up
AT1G15150	AT1G15150	0.560034	0.479814	0.478242	1.46422	0.977446	1.19036	0.00113009	1.03128	up
AT3G20460	AT3G20460	0.557247	0.253935	0.297349	0.970389	2.8949	2.05136	5.81378e-05	1.53615	up
AT1G21910	AT1G21910	5.86371	4.08828	13.2198	14.5782	41.943	16.3862	0.00517811	1.11993	up
AT2G25160	AT2G25160	0.64568	0.54937	0.601964	3.42745	7.23794	5.60668	1.22627e-22	2.63637	up
AT2G41970	AT2G41970	0.587671	0.362058	0.689234	1.86877	5.00649	3.58608	6.323e-09	1.94748	up
AT4G34760	AT4G34760	22.8601	17.1257	17.7589	5.82585	7.14576	10.641	3.23596e-05	-1.12789	down
AT5G28510	AT5G28510	0.395462	0.286326	0.535708	2.05425	2.8836	2.70772	9.657e-17	2.22353	up
AT3G54870	AT3G54870	0.32561	0.275422	0.334897	0.696847	1.73699	1.12333	5.56542e-06	1.48549	up
AT2G27370	AT2G27370	1.16007	1.49109	0.770086	2.24226	5.13677	3.29595	0.00114883	1.18744	up
AT2G25810	AT2G25810	3.46786	2.29645	2.36444	7.51328	18.6566	11.6587	1.54639e-08	1.74575	up
AT4G01110	AT4G01110	0.7093	0.781102	0.602438	1.07337	3.5982	1.941	0.00567246	1.10493	up
AT3G24210	AT3G24210	0.345275	0.164417	0.098937	0.539153	1.49985	0.678428	0.00508905	1.1866	up
AT5G54490	AT5G54490	1.69418	0.998966	1.30167	3.07983	6.5124	4.21918	0.000175154	1.31745	up
AT5G05490	AT5G05490	1.18161	1.6475	2.4325	0.234791	0.215175	0.35796	2.72828e-11	-2.07792	down
AT5G14020	AT5G14020	0.294859	0.149895	0.275929	0.803459	1.98586	1.0768	2.54681e-05	1.5748	up
AT2G26010	AT2G26010	4.13952	3.6133	7.33692	104.86	44.1159	69.0109	1.93154e-23	3.00335	up
AT3G43670	AT3G43670	4.63697	4.69255	4.96923	8.37763	11.6337	9.87618	6.64671e-11	1.01197	up
AT1G68650	AT1G68650	3.03012	2.73081	4.16545	4.78978	11.0906	7.46878	0.00186853	1.00475	up
AT2G48130	AT2G48130	5.18932	6.13157	6.70741	14.4809	12.9035	13.6266	4.21662e-12	1.12733	up
AT3G52400	AT3G52400	5.30745	4.20164	5.18142	11.0508	26.0427	9.48845	0.000114822	1.28851	up
AT5G38550	AT5G38550	0.611327	1.04133	1.17848	1.47699	3.75589	1.9609	0.00737312	1.00311	up
AT2G28400	AT2G28400	4.62006	4.10424	3.689	13.7778	14.8433	9.44353	2.43385e-09	1.42902	up
AT5G62280	AT5G62280	25.4676	17.0403	18.5075	39.8995	43.1895	58.2099	7.28166e-06	1.0773	up
Arabidopsis_thaliana_newGene_936	--	0.149837	0	0.289697	3.29941	3.34422	2.86216	6.03219e-10	2.32637	up
AT1G02900	AT1G02900	9.00986	7.42147	8.28716	14.2393	30.3999	17.3701	0.00014884	1.11024	up
AT3G21520	AT3G21520	0.911731	1.66115	1.32912	5.6778	4.17532	3.14455	2.04345e-05	1.37492	up
AT5G24910	AT5G24910	0.258549	0.152193	0.078343	0.615109	0.84043	0.65171	0.00072335	1.33108	up
AT2G29330	AT2G29330	1.41148	0.908455	2.08919	3.55135	7.43409	2.74101	0.00328367	1.1417	up
AT3G08860	AT3G08860	8.05976	8.69665	6.93246	33.0153	12.5585	18.8359	0.000443033	1.15707	up
AT1G50750	AT1G50750	0.229941	0.223382	0.230984	0.550843	1.05256	0.39988	0.00544926	1.08052	up
AT4G13580	AT4G13580	2.23094	2.28192	2.7442	3.70399	8.89339	5.03068	0.00199919	1.02335	up
AT5G42530	AT5G42530	149.496	129.887	170.803	444.841	734.644	516.949	1.28632e-19	1.76381	up
AT5G67060	AT5G67060	2.60678	2.77657	3.2002	4.82084	8.57433	10.6084	1.74891e-05	1.24261	up
AT3G05890	AT3G05890	10.7537	7.45978	7.11287	27.4297	87.702	46.7907	2.15374e-09	1.97784	up
AT2G41240	AT2G41240	123.456	72.6733	60.2277	49.9653	25.3943	17.9896	0.00436858	-1.07506	down
AT3G14280	AT3G14280	9.12008	7.85832	10.6413	22.9651	33.1577	22.1524	2.3299e-11	1.37846	up
AT3G01190	AT3G01190	6.27041	5.60917	4.94868	10.9909	23.4038	9.37869	0.00100433	1.09027	up
AT2G46860	AT2G46860	0.333649	0.403519	0.44188	1.69084	8.20916	3.8637	1.92843e-08	2.09489	up
AT1G13750	AT1G13750	1.77783	1.69304	3.07535	4.14404	6.81791	3.97902	0.000981339	1.00385	up
AT1G16370	AT1G16370	1.28375	0.796964	1.38105	1.97489	6.54382	3.21803	0.000966455	1.23953	up
AT1G20440	AT1G20440	57.8803	68.9554	44.0978	139.984	145.9	147.554	1.05994e-09	1.23118	up
AT5G40730	AT5G40730	8.46222	6.15518	6.68295	24.9868	91.9975	50.9958	5.24363e-11	2.17462	up
AT4G33720	AT4G33720	1.60131	9.92067	9.84712	50.8472	149.683	103.544	0.000410081	1.43356	up
AT1G69240	AT1G69240	0.525472	0.295342	0.179513	1.1247	4.43417	2.22659	1.81426e-05	1.67594	up
AT2G01880	AT2G01880	1.37471	1.27231	1.87241	1.8639	5.75645	3.97678	0.00796866	1.00271	up
AT4G01390	AT4G01390	2.14997	1.83966	0.920795	4.18661	9.64959	3.38057	0.00289729	1.18443	up
AT3G17070	AT3G17070	12.0362	15.6485	14.5615	2.86873	3.05752	5.74788	9.81761e-09	-1.57421	down
AT1G49130	AT1G49130	4.49976	4.78246	4.37258	8.49084	8.92863	12.9679	2.42777e-06	1.04888	up
AT1G09070	AT1G09070	59.1838	57.0386	66.0524	133.461	161.595	124.847	2.73823e-19	1.16326	up
AT1G01750	AT1G01750	3.65972	1.96118	2.68699	7.38038	23.9825	15.0274	2.46267e-07	1.77924	up
AT2G26020	AT2G26020	2.27348	2.15452	4.62167	26.8409	20.6512	15.6642	1.16197e-12	2.19455	up
AT4G19680	AT4G19680	0.740373	0.367403	0.973895	1.85829	5.65168	3.60438	1.15324e-05	1.61688	up
AT4G01240	AT4G01240	0.07727	0.112674	0.146935	0.536062	1.09431	0.50001	6.65775e-06	1.68586	up
AT4G28720	AT4G28720	1.03489	1.17358	1.32638	2.57812	3.60453	4.27041	1.66569e-08	1.3785	up
AT1G23720	AT1G23720	0.884261	0.64614	1.0601	1.77032	5.61749	3.08242	1.43836e-05	1.4955	up
AT4G29800	AT4G29800	0.430695	0.532445	0.652456	1.47117	1.75424	1.90054	2.42599e-08	1.43477	up
AT3G10660	AT3G10660	1.86414	1.42155	2.10739	3.09482	7.66494	4.61367	0.000120808	1.21739	up
AT5G57090	AT5G57090	2.17257	1.29613	1.69234	3.36769	10.3036	4.54324	0.000211646	1.3244	up
AT3G56220	AT3G56220	0.514131	0.529481	0.741746	1.39536	2.59834	2.11645	0.000136485	1.33157	up
AT4G17500	AT4G17500	7.21557	7.39897	13.9293	20.1388	33.1546	18.2457	0.00027008	1.10971	up
AT2G43590	AT2G43590	29.0181	20.8812	26.0026	65.0264	247.887	63.4239	0.00631249	1.17309	up
AT1G03940	AT1G03940	14.3106	15.4807	14.7669	6.01844	6.39605	8.75294	1.11489e-07	-1.00854	down
AT2G24850	AT2G24850	0.24465	0.96543	0.470167	1.18916	4.66594	2.11392	0.00292054	1.24561	up
AT3G21890	AT3G21890	16.0897	17.78	14.2005	7.5323	2.92003	4.09095	5.35231e-05	-1.34033	down
AT5G27420	AT5G27420	2.1583	1.39293	2.78575	4.64724	9.03449	3.22147	0.00517702	1.04608	up
AT3G47220	AT3G47220	0.335376	0.243156	0.260795	0.861879	1.53796	1.13922	1.71854e-07	1.62788	up
AT2G38500	AT2G38500	0.318819	0.155787	0.482664	1.1417	1.8605	1.57038	1.18661e-05	1.57398	up
AT3G05150	AT3G05150	0.48711	0.375382	0.357426	0.925205	2.23471	0.967688	0.00143534	1.21709	up
AT2G40000	AT2G40000	27.748	24.0046	28.9058	53.964	58.3257	57.1795	1.40803e-20	1.04361	up
AT5G44430	AT5G44430	1.24942	1.62896	2.60482	60.876	12.5382	28.5105	9.18671e-13	2.58146	up
Arabidopsis_thaliana_newGene_696	--	0.201322	0.274232	0.145205	1.08824	4.53247	2.73796	5.45663e-09	2.16692	up
AT2G45130	AT2G45130	0.781053	0.567519	0.362125	3.27628	1.28826	2.19555	0.0015814	1.25794	up
AT4G11650	AT4G11650	66.5901	72.8082	85.5949	157.932	304.042	121.584	0.000120808	1.14655	up
AT4G30170	AT4G30170	14.9623	11.9379	11.0081	32.4447	93.0708	48.2988	2.15032e-08	1.72966	up
AT1G17380	AT1G17380	1.44619	1.40282	1.93808	3.37458	4.68601	2.79731	0.000282998	1.01771	up
AT5G46890	AT5G46890	6.80539	3.92184	2.38583	10.2324	19.993	13.7831	0.000692713	1.24521	up
AT3G56400	AT3G56400	12.4567	7.93116	14.2311	34.0252	51.4603	38.7096	4.88683e-12	1.63547	up
AT5G14150	AT5G14150	0.339529	0.197189	0.182152	0.896798	2.4015	1.45895	1.55846e-06	1.76938	up
AT3G27150	AT3G27150	0.83142	0.896899	0.997573	2.18837	2.97478	2.49297	5.40363e-10	1.3541	up
AT1G75580	AT1G75580	6.95568	6.80534	6.81769	0.577736	1.23191	1.21425	8.51848e-18	-2.32561	down
AT5G60530	AT5G60530	1.12726	1.3744	1.40657	2.67264	12.0406	5.63676	9.32455e-06	1.62172	up
AT2G26290	AT2G26290	1.55872	1.42904	2.14198	3.26923	6.61838	3.98546	8.52283e-05	1.18662	up
AT1G54970	AT1G54970	1.65418	0.910087	1.27013	6.59169	23.2719	15.8798	2.49681e-14	2.53837	up
AT3G59080	AT3G59080	2.44832	2.15824	3.91642	6.68952	9.8476	5.37406	5.88943e-05	1.15844	up
AT4G07820	AT4G07820	2.42561	2.3266	4.03181	9.13129	23.3969	7.09162	3.42111e-05	1.51442	up
AT2G22860	AT2G22860	1.48368	2.21225	2.70721	5.74252	13.7729	7.00274	6.06913e-06	1.53341	up
AT3G23175	AT3G23175	3.15275	3.4584	4.22569	6.37588	15.422	7.64806	0.000364568	1.15526	up
AT5G10260	AT5G10260	2.04404	1.40654	1.52646	2.98351	7.69777	5.42669	0.000225065	1.27549	up
AT1G20070	AT1G20070	18.9554	19.0152	19.8639	7.63821	5.72676	5.8651	1.04289e-17	-1.49188	down
AT4G15390	AT4G15390	18.2078	15.0468	21.0639	29.4056	64.0716	38.2161	7.61221e-05	1.09567	up
AT3G04320	AT3G04320	0.833298	0.934792	0.741762	2.48245	12.5417	4.4716	4.14959e-06	1.76375	up
AT1G53903	AT1G53903	0.5417	0.535686	1.00292	1.70986	1.9349	1.68867	0.0055867	1.01561	up
AT3G60550	AT3G60550	1.03867	0.424681	0.963998	1.76067	5.34714	3.16688	0.000962511	1.31278	up
AT5G10990	AT5G10990	0.99376	0.497883	0.328746	1.88038	3.0771	2.1849	0.0010749	1.28124	up
AT5G09520	AT5G09520	1.08329	1.95277	1.26709	3.24876	4.32799	3.1305	0.00198807	1.03847	up
AT4G10370	AT4G10370	0.224419	0.161054	0.164162	0.701082	1.1325	0.557887	2.72991e-05	1.48985	up
AT5G06870	AT5G06870	12.9648	11.5961	15.6958	26.4487	40.8802	31.9535	3.68434e-10	1.20934	up
AT4G12510	AT4G12510	6.63265	6.44285	5.02532	14.3605	36.6492	21.0783	2.96662e-07	1.58145	up
AT1G74460	AT1G74460	2.2092	1.97521	1.90224	4.79626	5.22399	4.77821	5.02034e-11	1.19338	up
AT3G15240	AT3G15240	1.21642	0.597727	0.83864	2.35376	4.55569	2.37297	0.000157478	1.32988	up
AT4G27590	AT4G27590	1.77042	1.51596	1.62087	0.316291	0.863392	0.567802	0.00164348	-1.16207	down
AT1G62440	AT1G62440	0.495762	0.512339	0.826557	1.69887	4.98511	2.86536	1.26703e-07	1.76912	up
AT4G28530	AT4G28530	0.461286	0.343591	0.326719	1.1842	2.01723	2.42312	8.61701e-08	1.74621	up
AT5G15180	AT5G15180	1.47681	1.53516	1.48986	4.28163	6.50039	6.52937	2.40632e-14	1.72883	up
AT4G13620	AT4G13620	0.806837	0.540106	0.711332	1.70795	1.98773	1.32461	0.000576811	1.06237	up
AT1G61610	AT1G61610	0.769355	0.825454	0.931026	2.38042	1.92623	1.49433	4.52415e-05	1.05755	up
AT3G01260	AT3G01260	0.364077	0.597713	0.436027	1.95674	3.28666	1.62902	1.14614e-07	1.73437	up
AT3G43190	AT3G43190	0.678169	0.830519	0.753557	1.70528	2.90912	1.37652	0.000179767	1.15292	up
AT3G11550	AT3G11550	2.76866	2.10432	2.10308	4.07216	9.77932	4.37153	0.00442545	1.03621	up
AT4G38390	AT4G38390	0.190549	0.090392	0.210949	0.638756	1.59481	0.761444	1.56787e-05	1.63801	up
AT2G29090	AT2G29090	7.7215	10.1592	9.62467	1.91518	0.962052	2.91965	4.66203e-08	-1.74276	down
AT3G09925	AT3G09925	3.08406	2.55569	3.66517	12.2324	45.3462	25.2126	1.25283e-11	2.26645	up
AT4G27280	AT4G27280	14.7598	8.00948	20.5626	37.4218	61.9454	40.4013	8.2273e-06	1.37484	up
AT5G19560	AT5G19560	0.193211	0.189518	0.356738	0.748993	1.86495	0.782162	0.000203372	1.43058	up
AT3G50800	AT3G50800	1.75411	1.5092	2.15239	3.27891	5.97181	5.71771	6.55689e-05	1.20926	up
AT4G02270	AT4G02270	3.88942	3.14418	4.67773	12.3155	59.3105	29.7083	1.80782e-09	2.11807	up
AT4G36740	AT4G36740	0.617161	0.324442	0.490869	1.66473	2.63456	1.4254	0.000106958	1.41038	up
AT5G03350	AT5G03350	4.19739	2.12491	3.88813	5.39054	13.9238	10.4273	0.00102997	1.16208	up
AT3G16860	AT3G16860	1.05937	0.978558	1.68792	2.77556	4.50097	2.64362	4.00786e-05	1.19196	up
AT5G65140	AT5G65140	26.601	31.6631	32.4824	12.0928	6.44548	11.739	4.53655e-08	-1.38525	down
AT5G42510	AT5G42510	1.306	0.703919	1.06106	4.92383	11.9323	9.9544	4.90885e-12	2.26832	up
AT4G37010	AT4G37010	3.71498	3.7501	3.75993	7.68569	14.2977	6.62933	0.00037412	1.09258	up
AT1G65790	AT1G65790	0.458561	0.358163	0.285749	0.979662	1.23202	1.28401	1.61257e-06	1.3747	up
AT5G19890	AT5G19890	1.25043	1.81603	3.00657	11.0306	37.9967	17.0245	1.75227e-12	2.4075	up
AT1G24140	AT1G24140	0.513239	0.57116	0.660431	3.70047	4.32932	2.6339	1.23069e-17	2.21641	up
AT5G62165	AT5G62165	1.18401	1.21981	1.09983	2.68138	3.8809	3.24516	9.76668e-08	1.31797	up
AT4G30670	AT4G30670	8.9273	9.50921	12.9239	20.2834	59.7543	31.1953	9.51975e-06	1.43191	up
AT4G23810	AT4G23810	1.33445	1.16214	1.78024	3.14051	12.4507	3.6667	0.00026464	1.41021	up
AT1G44130	AT1G44130	0.103523	0.201775	0.35307	0.762391	2.57206	0.81006	0.00083793	1.37932	up
AT5G39150	AT5G39150	0.23132	0.648407	0.681267	1.76077	1.93346	1.83326	0.000375688	1.3036	up
AT5G10430	AT5G10430	7.94882	7.44404	6.60616	13.1127	28.6133	19.9281	6.63271e-06	1.25419	up
AT5G63160	AT5G63160	29.4156	41.7578	24.0541	16.8304	5.82608	13.0409	0.00296766	-1.07329	down
AT2G24980	AT2G24980	0.70601	0.816529	0.805395	3.11444	16.3494	8.95422	3.34462e-11	2.3553	up
AT5G40510	AT5G40510	3.64881	3.45187	4.56306	6.29387	13.1763	7.5338	0.000425786	1.02659	up
AT5G07100	AT5G07100	3.17575	3.48931	4.0227	7.83804	12.6972	5.69548	0.000231811	1.08887	up
AT1G13260	AT1G13260	8.64536	8.2332	13.8019	22.2349	28.89	29.5923	3.61738e-09	1.27846	up
AT2G39030	AT2G39030	3.43353	3.12906	2.00892	18.6823	15.6843	8.62502	3.20401e-09	1.83024	up
AT3G62040	AT3G62040	6.11992	6.90515	9.01294	18.5109	28.9881	14.1854	2.83226e-06	1.2763	up
AT4G37400	AT4G37400	0.483473	0.36515	0.558636	1.19512	2.43745	1.51716	7.88596e-06	1.45077	up
AT3G62820	AT3G62820	39.1057	43.6077	39.6028	12.4064	14.155	19.8305	2.3377e-10	-1.29418	down
AT5G26310	AT5G26310	0.676643	0.40042	0.440973	1.25792	2.22634	1.36021	0.000177285	1.27636	up
AT5G46900	AT5G46900	3.59201	3.1447	1.72931	6.92767	11.9038	6.83929	0.000376923	1.2169	up
AT5G51440	AT5G51440	36.8269	68.5075	112.794	13.1594	15.7211	11.4565	6.44386e-11	-1.94799	down
AT3G19430	AT3G19430	0.459068	0.551509	0.426665	1.29252	6.28266	2.23724	1.0267e-05	1.6887	up
AT5G44260	AT5G44260	4.59317	4.86348	4.53653	6.81055	9.46735	18.1599	0.0017745	1.03882	up
AT3G07490	AT3G07490	0.251783	0.136416	0.089294	2.03938	4.87042	2.4777	1.49694e-09	2.26168	up
AT1G04610	AT1G04610	0.339571	0.233369	0.2596	0.757726	2.22317	1.42494	1.06817e-05	1.60933	up
AT4G22666	AT4G22666	3.51763	1.81243	2.33139	9.57318	27.147	18.2533	2.33375e-10	2.0903	up
AT1G23840	AT1G23840	0.688159	0.852307	0.570239	1.6264	1.74632	2.16298	0.00026198	1.12635	up
AT3G21180	AT3G21180	0.223949	0.125627	0.091636	0.721696	2.16396	1.1606	1.50427e-08	2.04843	up
AT5G42500	AT5G42500	2.0306	1.83428	3.12548	4.23074	9.19445	6.1803	0.000364575	1.177	up
AT3G05155	AT3G05155	0.271082	0.297793	0.352959	0.758073	1.718	0.804488	0.00133309	1.23897	up
AT5G15120	AT5G15120	1.19525	1.06857	1.3609	1.85018	9.11894	3.74695	0.00138123	1.27787	up
AT3G25640	AT3G25640	1.63443	1.2619	1.51189	3.14548	3.4438	3.07958	6.99147e-06	1.02331	up
AT1G71200	AT1G71200	1.372	1.01931	1.27007	2.38698	5.48045	3.79669	0.000215492	1.26561	up
AT2G28780	AT2G28780	0.951259	1.22246	1.60303	4.42488	8.48533	4.3044	1.53361e-10	1.81519	up
AT3G09240	AT3G09240	0.307233	0.248895	0.333214	0.770358	1.8954	1.11312	6.38494e-05	1.45715	up
AT2G28500	AT2G28500	0.368548	0.480536	0.761328	1.43919	2.04539	1.35776	0.00183325	1.15113	up
AT1G09240	AT1G09240	2.66226	2.88765	6.36225	11.7838	16.8076	8.31857	0.000149306	1.27835	up
AT4G30420	AT4G30420	0.469275	0.50812	0.603524	0.881781	3.6771	2.67799	0.000454761	1.37972	up
AT1G35290	AT1G35290	5.16584	5.47092	7.15927	1.70493	2.44493	2.09442	1.37277e-09	-1.35844	down
AT2G32140	AT2G32140	0.151802	0.218262	0.342808	1.10083	1.69896	0.71271	7.7403e-05	1.50618	up
AT2G32680	AT2G32680	0.092826	0.145169	0.079176	1.42394	0.811346	0.682998	2.26812e-10	2.19674	up
AT4G13390	AT4G13390	0.239308	0.333683	0.596203	2.54338	10.563	7.55428	2.18348e-13	2.60948	up
AT5G35490	AT5G35490	1.39492	2.36673	1.7337	4.81786	4.94507	5.43012	1.05681e-06	1.273	up
AT1G51880	AT1G51880	0.11807	0.09751	0.147675	0.386062	1.40212	0.582933	3.23836e-05	1.6139	up
AT2G17040	AT2G17040	2.61002	1.48851	2.36143	13.9236	12.7526	13.2327	8.22267e-26	2.34266	up
AT1G53870	AT1G53870	6.82166	6.46612	6.63717	20.7913	10.8787	26.8544	1.76311e-05	1.29682	up
AT1G76240	AT1G76240	2.64682	2.68424	2.66369	5.00909	10.1781	6.97216	3.73917e-06	1.25551	up
AT1G80240	AT1G80240	3.48157	2.46634	2.22201	9.77757	21.8584	12.3957	4.4775e-11	1.94862	up
AT5G02350	AT5G02350	0.224489	0.323513	0.222037	0.731276	2.04826	0.76618	0.000269871	1.41164	up
AT5G23950	AT5G23950	0.541795	0.365662	0.798152	2.25119	2.15056	1.60293	7.64286e-05	1.36371	up
AT2G30210	AT2G30210	2.54179	3.51451	2.50802	7.14158	13.85	7.58003	1.562e-07	1.46009	up
AT5G17680	AT5G17680	0.671222	0.907344	1.05234	0.351776	0.377188	0.388406	1.1051e-05	-1.08885	down
AT1G16510	AT1G16510	3.88317	4.08759	4.78824	1.1876	1.31086	1.40789	4.11063e-13	-1.54876	down
AT1G63450	AT1G63450	0.108921	0.1839	0.184637	0.484124	1.29384	0.809348	1.50247e-06	1.70522	up
AT2G47360	AT2G47360	0.525673	0.571194	0.794205	1.88411	4.53351	2.65699	5.46343e-07	1.68294	up
AT4G17280	AT4G17280	1.90229	2.25051	1.57095	4.48275	5.6462	5.67499	2.16084e-09	1.31897	up
AT5G10760	AT5G10760	0.561938	0.536757	0.553737	2.07737	2.85409	0.962884	0.000222929	1.33155	up
AT1G11210	AT1G11210	0.410335	0.846348	0.342949	3.18195	1.00005	2.42688	0.00274713	1.23255	up
AT2G26560	AT2G26560	2.78825	2.95571	5.02419	10.2362	19.0759	3.88485	0.00755031	1.08531	up
AT5G12030	AT5G12030	7.70602	30.5813	47.1076	6.17622	2.52156	4.20719	0.00691149	-1.15965	down
AT4G23140	AT4G23140	0.296409	0.19078	0.259633	1.25173	1.72047	1.20346	9.18671e-13	2.01427	up
AT5G10250	AT5G10250	1.13965	1.64763	0.80131	0.319492	0.176665	0.177313	4.69073e-06	-1.65462	down
AT5G48110	AT5G48110	1.61406	1.22381	1.28865	2.68978	6.24083	3.59701	5.96466e-05	1.27461	up
AT3G05920	AT3G05920	1.7875	1.30632	0.957911	4.23426	10.9287	7.37717	2.05061e-07	1.77922	up
AT1G14250	AT1G14250	4.07527	1.28372	1.14735	10.5061	10.6773	10.4855	2.72991e-05	1.54651	up
AT3G09940	AT3G09940	2.98477	2.40426	3.07879	3.58972	21.7366	6.32545	0.00551127	1.15541	up
AT2G44450	AT2G44450	2.66021	1.31913	2.3367	3.32246	11.0941	5.25232	0.00291398	1.1443	up
AT2G22510	AT2G22510	0.838958	1.38253	1.0868	2.52915	3.9972	3.0719	5.92275e-05	1.24399	up
AT4G24570	AT4G24570	3.95482	2.18774	5.23661	9.11461	28.9676	7.76682	0.000854838	1.31032	up
AT4G36610	AT4G36610	1.9295	1.80762	1.23147	3.57538	4.42983	4.16921	3.17194e-05	1.11141	up
AT1G18140	AT1G18140	0.338566	0.223172	0.175053	0.514267	1.35482	0.780185	0.00313364	1.18727	up
AT5G66170	AT5G66170	19.064	14.9409	19.2533	28.7506	42.1107	44.164	1.64463e-06	1.01637	up
AT5G62340	AT5G62340	1.21822	0.729822	0.417478	3.039	10.0852	6.04653	6.55514e-07	1.8629	up
AT3G29410	AT3G29410	0.314685	0.532128	0.577396	2.90816	8.2842	6.87012	1.56395e-17	2.71753	up
AT1G52050	AT1G52050	0.270582	0.523574	0.750349	0.945785	4.23049	1.37494	0.00803087	1.13892	up
AT5G13320	AT5G13320	0.988971	0.678231	1.6909	3.81808	5.16007	1.55259	0.00456727	1.12683	up
AT5G13990	AT5G13990	0.576106	0.719705	0.610434	1.30128	2.77344	1.71285	2.95045e-05	1.2925	up
AT1G24147	AT1G24147	3.8679	3.88315	2.42157	14.4541	10.443	14.8327	1.3081e-09	1.65529	up
AT4G24310	AT4G24310	0.656215	0.677749	0.807106	1.64842	3.76748	1.22492	0.00944983	1.06575	up
AT3G25930	AT3G25930	7.88438	6.21433	9.56461	14.0091	27.1968	16.6223	8.6547e-05	1.10222	up
AT2G16750	AT2G16750	1.67405	1.66472	2.09525	3.18127	4.43884	4.08469	7.29215e-08	1.03145	up
AT4G08410	AT4G08410	0.161106	0.109088	0.100346	0.836778	3.88697	1.79018	2.48527e-10	2.34504	up
AT1G09090	AT1G09090	0.597341	0.65944	0.693004	2.03858	4.56034	1.88771	1.83106e-07	1.65948	up
AT1G09170	AT1G09170	0.300305	0.328258	0.237253	0.650746	1.42687	1.07374	1.2073e-05	1.43392	up
AT2G22500	AT2G22500	5.44024	5.26164	8.1995	16.2315	28.0341	12.3193	8.2273e-06	1.31668	up
AT4G21340	AT4G21340	0.56636	0.241656	0.563146	1.20773	2.08542	1.27501	0.00130245	1.21935	up
AT4G18430	AT4G18430	1.31246	1.42381	1.7486	4.00118	10.0268	4.29405	7.06597e-06	1.52337	up
AT5G58670	AT5G58670	1.07937	1.6052	2.0932	3.0105	7.0046	3.95176	0.000211646	1.22434	up
AT1G73500	AT1G73500	3.5736	3.30095	5.55729	9.9385	11.7323	9.77303	1.17868e-08	1.23025	up
AT2G35710	AT2G35710	0.505123	1.32041	1.12502	1.61927	2.3635	1.94152	0.000175362	1.11681	up
AT5G53820	AT5G53820	1.07316	1.73049	1.03567	2.52883	6.51867	3.63341	0.00238534	1.17375	up
AT4G19200	AT4G19200	54.0178	53.2308	55.6331	118.083	158.599	141.055	3.98169e-24	1.30898	up
AT1G63750	AT1G63750	1.36986	1.45102	1.98019	4.48063	4.61485	4.02166	4.62377e-15	1.31258	up
AT1G57990	AT1G57990	4.30107	4.05227	5.89865	12.7218	23.6206	12.9865	3.23583e-09	1.5454	up
AT1G61590	AT1G61590	1.76301	1.1781	1.40129	3.28319	4.76866	3.12966	1.56183e-05	1.16986	up
AT5G26010	AT5G26010	1.78081	1.55058	1.98033	3.37935	6.51677	3.82103	0.000122966	1.13966	up
AT4G38560	AT4G38560	0.706498	0.582469	1.13351	2.06156	3.02935	1.94619	2.9974e-05	1.2648	up
AT3G15500	AT3G15500	1.68678	1.77724	2.08284	6.40044	5.42397	4.04846	1.50427e-08	1.35494	up
AT3G01950	AT3G01950	2.4042	2.35224	2.70109	4.32216	11.2288	5.91172	0.00197031	1.12732	up
AT3G07900	AT3G07900	0.305018	0.304657	0.362081	0.900025	2.28777	1.49067	8.42419e-07	1.66659	up
AT3G04210	AT3G04210	3.21707	3.71759	8.60218	12.3776	24.0974	11.4809	0.000529107	1.23182	up
AT1G15210	AT1G15210	2.90312	2.39836	2.91237	5.32456	11.7002	6.4417	3.778e-06	1.28343	up
AT2G32300	AT2G32300	2.31076	1.44891	1.89313	3.48027	6.26893	4.3613	0.000406744	1.08457	up
AT5G44565	AT5G44565	0.548778	0.881429	0.841191	1.60517	4.33178	3.1711	0.000417231	1.34348	up
AT1G53130	AT1G53130	0.731337	0.215953	0.269111	1.98276	5.43013	2.62961	1.31239e-05	1.70141	up
AT2G41800	AT2G41800	2.30953	1.03959	1.8057	5.33677	17.4346	9.43182	1.33604e-07	1.84881	up
AT4G34580	AT4G34580	1.23353	1.02302	0.93415	2.89676	9.4536	5.94585	6.34643e-09	1.89195	up
AT4G14130	AT4G14130	2.34435	1.51671	2.83597	5.85683	15.9994	10.2451	1.12127e-07	1.72748	up
AT1G06090	AT1G06090	2.0768	2.48461	1.91265	3.52657	8.03708	4.59063	0.00128424	1.05384	up
AT1G31580	AT1G31580	230.477	169.103	169.435	498.434	578.673	559.634	5.31146e-15	1.4171	up
AT3G50970	AT3G50970	4.45488	4.7812	3.8157	12.1988	15.9485	12.7904	5.22229e-15	1.51517	up
AT5G05500	AT5G05500	4.82218	2.63862	4.33458	13.3139	52.6124	24.9281	6.44788e-09	2.03109	up
AT2G46140	AT2G46140	4.85854	2.8619	3.18593	5.5012	17.0047	10.2698	0.00197228	1.14637	up
AT5G61600	AT5G61600	3.93384	2.51253	5.05487	9.21851	17.8014	9.04498	3.31931e-05	1.31938	up
AT5G57190	AT5G57190	0.649495	1.08663	1.03133	2.45981	1.878	2.25989	8.15992e-05	1.08464	up
AT4G04460	AT4G04460	1.01665	0.972339	0.838663	2.79562	5.0432	3.36614	2.05307e-10	1.68744	up
AT3G21770	AT3G21770	11.5201	8.9103	9.10032	16.6265	40.8833	18.342	0.00101066	1.08052	up
AT1G61120	AT1G61120	0.137105	0.04104	0.045293	0.778605	2.04203	1.15838	4.44123e-11	2.41069	up
AT5G65530	AT5G65530	1.96104	1.94407	2.23043	3.53179	5.595	4.12508	4.28373e-06	1.01332	up
AT2G36050	AT2G36050	2.12644	2.16595	2.19869	4.79081	4.62175	5.26828	9.04568e-10	1.09984	up
AT3G49845	AT3G49845	0.77998	0.535484	1.0018	2.30146	5.43675	2.42992	6.07034e-05	1.4721	up
AT1G52660	AT1G52660	0.361448	0.153763	0.135133	0.835752	3.34812	1.11426	0.000329148	1.46891	up
AT5G14920	AT5G14920	27.0747	25.4249	39.245	48.1407	109.515	76.6005	4.85587e-05	1.15002	up
AT5G07010	AT5G07010	1.05057	1.12904	1.3012	3.66672	5.6951	5.51143	1.95327e-16	1.8661	up
AT2G37130	AT2G37130	10.7191	12.6321	15.2886	26.1832	37.7319	29.9074	3.15774e-11	1.20192	up
AT5G48940	AT5G48940	0.457388	0.590444	0.669273	0.883558	2.16214	1.16118	0.00375126	1.01018	up
AT1G43160	AT1G43160	2.13952	3.13638	3.62351	7.34899	12.1611	9.64454	3.10864e-09	1.49474	up
AT5G23270	AT5G23270	0.21068	0.199997	0.221865	0.520037	0.500907	0.550191	0.00303375	1.02135	up
AT1G23200	AT1G23200	1.52087	1.90817	1.61479	0.646279	0.84657	0.494916	4.10191e-05	-1.14829	down
AT2G04570	AT2G04570	11.8286	13.8329	11.3591	5.2035	4.57947	6.50094	8.79508e-08	-1.09887	down
AT4G31875	AT4G31875	6.44578	6.27856	5.693	2.98226	2.16056	2.10563	7.0301e-06	-1.16951	down
AT5G23020	AT5G23020	17.2173	21.2926	25.4749	59.1653	68.1173	49.9615	1.5922e-15	1.38799	up
AT5G27060	AT5G27060	0.055326	0.174497	0.287442	0.431089	1.44698	0.888181	0.00148517	1.31853	up
AT5G06720	AT5G06720	0.736488	0.621507	0.855764	6.37348	20.6285	7.82212	1.82306e-17	2.81017	up
AT1G20450	AT1G20450	53.5522	60.5811	50.9619	133.465	149.091	145.372	6.16996e-26	1.32551	up
AT4G37160	AT4G37160	1.06052	0.457232	0.581612	1.98213	7.45823	3.89321	6.75906e-06	1.69365	up
AT5G19520	AT5G19520	0.985134	0.55476	0.711412	2.40163	6.72306	2.92984	3.86789e-07	1.74558	up
AT5G18360	AT5G18360	2.81416	3.64707	4.28084	1.49712	1.82019	1.2039	9.10029e-07	-1.1232	down
AT4G14060	AT4G14060	4.13321	3.51416	3.13445	6.26471	12.5384	9.1789	0.00010793	1.14355	up
AT4G25070	AT4G25070	0.621233	1.11851	1.03003	1.84873	4.05574	2.45569	9.17208e-05	1.26358	up
AT1G66090	AT1G66090	0.690843	0.398492	1.54336	2.85159	7.72686	2.94024	0.000199363	1.46375	up
AT5G17820	AT5G17820	10.2509	6.62028	8.33407	24.6714	80.6715	42.437	1.80358e-09	1.93752	up
AT1G68850	AT1G68850	0.765426	0.887134	0.573343	1.66795	3.09024	1.73677	0.000534095	1.18408	up
AT1G13420	AT1G13420	1.25797	0.686185	0.489179	4.59144	11.9462	7.07641	6.41147e-11	2.25308	up
AT5G10695	AT5G10695	2.97888	1.52183	2.50432	5.01644	8.50309	5.91763	0.000425034	1.15833	up
AT2G36780	AT2G36780	0.388937	0.349551	0.328136	1.16556	1.27746	0.752596	0.000205693	1.23273	up
AT3G50640	AT3G50640	2.0913	1.20711	1.15807	4.46257	8.7577	6.20242	5.53117e-07	1.62285	up
AT1G52100	AT1G52100	25.8438	20.35	20.0467	2.61227	3.45518	4.04865	8.99043e-32	-2.47642	down
AT2G44800	AT2G44800	0.96111	0.904055	1.02439	0.302497	0.316236	0.294315	3.02356e-05	-1.32312	down
AT3G23090	AT3G23090	4.00597	3.4986	4.31281	7.77437	12.2722	10.8279	9.04568e-10	1.26619	up
AT1G19020	AT1G19020	5.01218	4.23466	5.93065	15.2818	27.5923	9.35076	5.97227e-05	1.36122	up
AT5G65207	AT5G65207	1.99165	3.24055	1.74866	5.24408	9.20855	10.1755	6.70446e-05	1.36731	up
AT3G08870	AT3G08870	1.34994	1.28716	1.40169	3.57152	3.05221	2.81298	4.45308e-09	1.13841	up
AT4G11210	AT4G11210	1.36117	1.34312	1.22256	2.46108	5.93339	5.0621	0.000163667	1.3183	up
AT1G35230	AT1G35230	1.328	1.41982	2.07749	4.61708	16.6715	5.13311	4.22445e-05	1.56457	up
AT1G64110	AT1G64110	2.79195	3.41672	3.96713	1.33597	0.875853	1.62147	3.34936e-06	-1.21976	down
AT4G21380	AT4G21380	0.580144	0.663602	0.756509	1.43558	2.94103	1.66126	8.2273e-06	1.31989	up
AT1G07400	AT1G07400	18.4128	33.3676	44.9532	6.82375	5.543	6.70697	6.32879e-13	-1.95877	down
AT3G45700	AT3G45700	0.340196	0.28213	0.249266	1.16782	2.63391	1.53916	3.41519e-09	1.94136	up
AT1G04180	AT1G04180	0.188376	0.232075	0.309427	1.05336	1.81264	1.32746	6.94503e-09	1.88651	up
AT5G24655	AT5G24655	0.921428	0.611242	0.815856	3.47711	2.04851	2.9038	0.000156459	1.34169	up
AT4G15330	AT4G15330	0.558564	0.509505	0.956144	1.43782	3.77282	1.76188	0.000616396	1.27196	up
AT3G62760	AT3G62760	0.531554	0.325379	0.260408	1.50494	5.19687	2.77492	3.99567e-06	1.77669	up
AT3G56970	AT3G56970	53.0751	27.1693	28.7479	16.4057	10.6191	4.54222	0.00101937	-1.252	down
AT5G51160	AT5G51160	0.487155	0.714489	0.606518	1.1246	1.84565	1.53713	0.000405773	1.08747	up
AT5G20790	AT5G20790	7.03227	9.89765	6.77337	19.8732	21.2179	17.5813	2.20232e-08	1.19249	up
AT3G28550	AT3G28550	1.72339	1.74569	1.71278	5.29668	21.2549	9.62861	1.43141e-09	2.03525	up
AT2G27830	AT2G27830	13.8667	12.0928	14.2071	37.1713	21.3374	39.1625	1.12776e-05	1.13157	up
AT5G10130	AT5G10130	2.44313	1.43756	1.04415	4.4918	16.4339	7.65062	2.00355e-05	1.61384	up
AT2G18120	AT2G18120	3.42979	3.93509	1.73649	1.19126	1.04612	1.21246	0.00457695	-1.05465	down
Arabidopsis_thaliana_newGene_264	--	2.49739	3.51793	3.31579	0.948413	0.59289	0.644003	9.9314e-14	-1.82008	down
AT2G31730	AT2G31730	5.08448	4.29981	5.32381	8.32904	12.6254	11.8393	6.55514e-07	1.05659	up
AT2G25260	AT2G25260	2.1741	1.63952	2.10578	3.18161	7.05208	4.53695	0.000778648	1.06747	up
AT3G55646	AT3G55646	1.58823	1.34788	1.65421	0.542581	0.65987	0.707385	0.000529137	-1.05063	down
AT4G22080	AT4G22080	0.561777	0.436865	0.417844	2.02174	5.72025	3.73955	2.61644e-11	2.19912	up
AT3G49580	AT3G49580	9.5049	7.64465	11.4479	41.0322	9.21553	48.7932	0.00420428	1.16523	up
AT5G04150	AT5G04150	28.2335	20.4831	16.4991	8.47841	6.36399	4.37903	1.38906e-06	-1.45118	down
AT5G02420	AT5G02420	1.71204	1.43483	1.35167	2.9491	6.26086	4.00871	0.000225065	1.21761	up
AT2G31865	AT2G31865	1.48671	1.79591	2.194	4.65563	7.39304	3.91637	9.2623e-07	1.32398	up
AT4G28040	AT4G28040	4.35167	4.1589	3.56139	9.91606	9.83762	9.7859	2.09684e-15	1.26044	up
AT3G04640	AT3G04640	0.662647	0.666925	1.09802	2.37143	5.7886	1.63433	0.00175817	1.26091	up
AT5G28910	AT5G28910	1.75311	2.12641	2.12768	0.847081	0.553064	0.733834	2.30063e-07	-1.30266	down
AT2G15370	AT2G15370	0.347841	0.366299	0.29984	1.02541	2.83735	1.8004	4.56874e-07	1.75277	up
AT3G45070	AT3G45070	1.88736	1.20104	1.00833	3.39882	7.67434	6.0849	3.83266e-06	1.55062	up
AT1G05260	AT1G05260	10.0093	7.85471	8.9567	20.012	41.5689	23.7599	8.81699e-08	1.42619	up
AT3G16150	AT3G16150	4.66435	2.63305	2.62392	15.6962	12.76	16.4784	6.28773e-12	1.84051	up
AT5G43290	AT5G43290	1.32582	1.36879	1.93488	0.445387	0.812477	0.513272	0.00174436	-1.07204	down
AT2G34910	AT2G34910	0.893242	0.540268	0.291062	1.82488	4.26469	2.95461	3.44135e-05	1.55519	up
AT4G39320	AT4G39320	0.855283	0.959594	0.865272	1.93412	2.87569	1.97303	0.000899665	1.07457	up
AT3G19390	AT3G19390	2.61	2.55572	2.64885	4.92497	12.1949	7.36837	5.03863e-06	1.35334	up
AT2G21640	AT2G21640	15.979	16.7146	28.4178	6.60772	9.63497	8.37404	1.23048e-05	-1.14121	down
AT1G70460	AT1G70460	0.6192	0.6184	0.602726	1.42844	5.20192	2.65129	1.89787e-06	1.66811	up
AT5G16980	AT5G16980	8.31194	8.28199	10.3633	4.98348	2.70702	2.02606	0.000389967	-1.16215	down
AT1G16440	AT1G16440	0.283894	0.184973	0.322371	0.689269	1.85177	1.23167	4.27795e-05	1.51711	up
AT5G57540	AT5G57540	1.32185	1.19867	1.09641	5.24308	17.8269	10.7855	2.00937e-12	2.32822	up
AT4G07960	AT4G07960	0.292615	0.385551	0.593967	1.30588	3.50838	2.18109	6.23351e-08	1.82018	up
AT5G50260	AT5G50260	0.471922	0.873333	0.604828	2.04135	2.55365	1.79014	2.02214e-06	1.40895	up
AT1G24150	AT1G24150	2.20752	2.49583	2.86121	5.52484	5.59742	4.89278	1.5375e-11	1.03752	up
AT4G15290	AT4G15290	0.282092	0.202969	0.191718	0.410832	1.05681	0.582792	0.00635672	1.07892	up
AT3G45010	AT3G45010	16.2398	18.3893	17.1318	39.147	34.6015	32.8644	6.4681e-13	1.00446	up
AT1G66470	AT1G66470	0.44173	0.41163	0.528284	0.778358	2.21763	1.61439	0.00127611	1.2156	up
AT4G23690	AT4G23690	8.70403	7.63504	7.09417	14.7264	25.3584	13.2827	0.000282998	1.01435	up
AT2G43530	AT2G43530	22.263	14.1016	13.447	38.5201	64.6652	56.5433	1.59187e-07	1.42202	up
AT5G23840	AT5G23840	1.3982	0.534672	0.789531	1.74098	6.09247	2.89408	0.00612926	1.14855	up
AT4G02290	AT4G02290	10.9078	9.78735	7.34248	15.2606	30.4949	20.0396	0.000272353	1.03757	up
AT2G42850	AT2G42850	1.18511	0.656678	1.11746	2.38482	5.0559	3.98158	1.51039e-06	1.52883	up
AT4G01480	AT4G01480	21.4486	19.6411	28.444	38.7877	69.1809	49.5786	6.14162e-06	1.06228	up
AT1G32450	AT1G32450	21.0831	26.4271	27.4374	87.1573	89.2088	86.6612	2.92369e-54	1.76507	up
AT4G15230	AT4G15230	1.0676	0.847653	1.07657	1.89294	2.85981	2.27164	1.9733e-07	1.11911	up
AT2G36885	AT2G36885	9.38087	7.34592	9.60012	14.325	20.4883	22.7133	4.60383e-06	1.01789	up
AT5G25190	AT5G25190	38.3507	28.7383	29.2982	69.4619	66.7817	118.099	4.80077e-06	1.21115	up
AT4G39580	AT4G39580	0.44923	0.52696	0.737542	1.4705	2.0982	0.973321	0.00568683	1.03712	up
AT1G54020	AT1G54020	0.461784	0.27239	0.254327	0.788772	1.73704	1.75532	0.000213577	1.39502	up
AT1G66020	AT1G66020	0.26841	0.412444	0.372749	0.766453	1.0908	0.704252	0.00216731	1.02144	up
AT5G01050	AT5G01050	0.256704	0.292045	0.505219	0.715846	1.82793	0.778382	0.00683355	1.09567	up
AT1G08810	AT1G08810	16.6831	19.124	18.7105	7.2844	6.93495	8.38167	8.53871e-18	-1.22533	down
AT1G72870	AT1G72870	0.222201	0.147169	0.311606	0.576603	1.12979	0.491734	0.00767156	1.09157	up
AT1G74650	AT1G74650	1.08019	1.38844	1.58927	2.27039	4.23388	3.54924	0.000102704	1.11154	up
AT2G18800	AT2G18800	0.584567	0.789159	0.465384	1.08149	3.96748	1.55727	0.00925828	1.0993	up
AT4G36430	AT4G36430	6.03111	4.53811	4.9454	8.48714	21.8436	10.8135	0.000797097	1.11016	up
AT2G32190	AT2G32190	1.17572	0.630399	1.45762	3.65773	5.24418	2.93011	0.000125325	1.35941	up
AT4G36700	AT4G36700	3.21183	1.91448	1.97724	0.595107	0.443024	0.351642	3.43549e-09	-1.84099	down
AT5G06630	AT5G06630	0.390266	0.351451	0.363125	2.71331	12.0206	6.14259	2.14025e-15	2.75308	up
AT2G34655	AT2G34655	0.189625	0.062906	0.445793	1.2742	2.00529	2.12731	2.17268e-05	1.66449	up
AT1G12160	AT1G12160	0.999656	1.03198	1.24925	1.62204	4.31292	3.29857	0.000646195	1.15837	up
AT4G40090	AT4G40090	5.2338	3.62782	4.43858	18.6278	69.2481	37.1112	7.13894e-13	2.35861	up
AT4G30290	AT4G30290	14.4273	11.248	15.2758	24.674	68.099	57.3234	6.64578e-07	1.51225	up
AT4G18510	AT4G18510	0.668141	0.572253	0.624118	2.57151	4.59118	2.17032	2.93159e-06	1.6454	up
AT2G44110	AT2G44110	0.369553	0.351272	0.396901	1.7074	5.01248	3.189	2.34992e-12	2.29918	up
AT4G11610	AT4G11610	0.155166	0.060506	0.108687	0.375266	1.21799	0.788875	5.90555e-06	1.7283	up
AT1G62280	AT1G62280	0.190092	0.464513	0.452668	1.13441	1.5078	0.911984	0.00154387	1.19079	up
AT5G47220	AT5G47220	4.66719	5.80686	10.8098	16.0618	20.511	12.6325	0.00135316	1.01131	up
AT3G16440	AT3G16440	1.56811	1.64959	1.67324	2.85844	8.57571	3.96078	0.000620714	1.22402	up
AT5G15890	AT5G15890	0.130031	0.156806	0.259718	0.735053	1.53221	0.937924	9.65739e-07	1.74717	up
AT5G64870	AT5G64870	0.417425	0.991143	0.864121	4.17835	2.68197	2.38855	3.77441e-06	1.54798	up
AT1G15890	AT1G15890	0.32696	0.369252	0.373714	0.923188	0.913557	0.687601	6.88896e-05	1.07296	up
AT5G49680	AT5G49680	0.396083	0.750127	0.739726	1.01822	2.14159	1.34225	0.00195984	1.01568	up
AT1G62320	AT1G62320	0.143709	0.152384	0.23958	0.539696	1.97346	0.875237	1.87256e-05	1.6395	up
AT3G07070	AT3G07070	0.366504	0.304918	0.315439	1.43345	4.99103	2.79304	2.86937e-10	2.19574	up
AT4G17490	AT4G17490	0.966639	0.683747	1.8169	3.18768	6.26097	2.62994	0.000975639	1.25669	up
AT5G61650	AT5G61650	1.54829	1.07132	1.43884	3.29079	8.17571	4.82359	6.12926e-06	1.51604	up
AT3G22570	AT3G22570	1.97398	2.3611	2.6012	3.58828	13.0631	5.38889	0.00323495	1.14692	up
AT5G57560	AT5G57560	11.5576	10.2089	31.1033	46.4581	102.581	46.7706	0.000215492	1.35899	up
AT3G24240	AT3G24240	1.13583	0.600362	0.857773	2.05998	3.88478	1.71404	0.000459937	1.19928	up
AT5G47000	AT5G47000	1.67005	1.93331	2.21581	0.568714	0.659489	0.77455	9.92124e-08	-1.34245	down
AT3G20940	AT3G20940	0.295934	0.364008	0.589648	1.41878	3.82401	1.74577	1.38906e-06	1.7262	up
AT4G30280	AT4G30280	9.62078	5.71007	11.8027	24.9633	97.6164	34.9768	0.00265259	1.26849	up
AT5G39520	AT5G39520	0.608174	0.998192	1.73489	11.9606	9.09053	1.08191	0.00209762	1.29311	up
AT4G00680	AT4G00680	2.43975	1.84774	2.4049	5.9363	20.728	10.7293	2.66886e-07	1.77758	up
AT3G02040	AT3G02040	10.4214	11.3175	9.79309	17.7644	32.3571	20.8153	1.50395e-05	1.03943	up
AT5G36180	AT5G36180	1.21068	1.09593	1.29892	2.65469	3.86762	3.0438	3.7171e-09	1.27691	up
AT5G14330	AT5G14330	5.9908	4.72871	6.62928	18.3477	98.7005	41.1068	7.09682e-09	2.08495	up
AT5G14130	AT5G14130	0.739805	0.677208	0.771321	1.69678	2.27018	1.95676	2.18282e-06	1.23567	up
AT5G63660	AT5G63660	2.8143	2.34017	1.60461	4.40883	30.7541	14.6561	0.000218025	1.49932	up
AT4G27290	AT4G27290	0.231765	0.647803	0.414064	0.908859	1.79048	1.11719	0.00442545	1.09907	up
AT5G49270	AT5G49270	0.594007	0.727707	0.409472	1.97216	5.47276	3.37819	6.00259e-09	1.93657	up
AT4G01670	AT4G01670	0.895913	0.725519	0.622369	1.76388	2.26858	1.86078	5.43131e-05	1.16351	up
AT3G54580	AT3G54580	1.77947	1.36958	1.97062	5.37594	24.7864	12.1927	8.17344e-10	2.1265	up
AT5G58750	AT5G58750	0.259651	0.488761	0.47901	0.997332	3.5527	1.43839	0.000417356	1.39982	up
AT4G37070	AT4G37070	6.09214	5.21291	6.6435	11.4786	23.5241	11.1061	0.000115537	1.13873	up
AT1G56540	AT1G56540	0.168342	0.2866	0.269276	0.866748	0.961652	0.874274	3.86394e-10	1.62632	up
AT2G33580	AT2G33580	1.36921	1.39796	1.89118	3.08822	5.23248	2.64997	0.000375688	1.04625	up
AT1G74930	AT1G74930	0.812165	0.322795	0.703645	2.19027	1.85953	1.72829	0.00108698	1.20054	up
AT5G16360	AT5G16360	2.34609	1.58007	2.27153	4.00964	10.6169	4.1552	0.0014433	1.16852	up
AT5G23220	AT5G23220	1.99744	2.60263	2.74291	4.18179	6.99145	5.96604	4.54475e-05	1.06815	up
AT1G19050	AT1G19050	22.4457	25.62	25.0237	9.14267	13.4126	11.0939	7.24002e-10	-1.0618	down
AT2G24300	AT2G24300	2.20376	1.80266	2.18409	3.33841	7.99279	5.15794	0.000118278	1.16383	up
AT4G11050	AT4G11050	0.300333	0.263283	0.36742	0.868092	2.37746	1.29644	4.99747e-06	1.61312	up
AT5G23980	AT5G23980	1.35484	1.62338	1.60143	4.58782	15.2144	5.55722	1.40577e-07	1.79462	up
AT4G00910	AT4G00910	0.300843	0.200732	0.492314	1.93888	1.96174	1.1766	7.22064e-07	1.70713	up
AT1G27140	AT1G27140	0.934443	0.613929	0.331757	1.37655	4.32781	2.86957	0.00181503	1.27763	up
AT3G21660	AT3G21660	8.46516	15.5479	13.961	1.71735	0.275436	0.579948	0.000225065	-1.49057	down
AT1G72910	AT1G72910	7.88232	4.88588	7.67069	17.4911	18.3871	12.8962	5.57788e-06	1.11633	up
AT5G45650	AT5G45650	8.13579	7.47695	5.79371	15.4036	14.843	19.9375	3.74642e-07	1.11262	up
AT2G36100	AT2G36100	5.34027	3.36913	4.38402	9.54585	18.2744	12.0763	1.97747e-06	1.34795	up
AT1G54890	AT1G54890	0.944309	0.644727	0.409633	1.29561	6.83673	2.39991	0.00181503	1.29752	up
AT5G24660	AT5G24660	22.2571	16.8849	20.5599	62.9643	23.6643	69.3177	0.0025067	1.07121	up
AT5G44568	AT5G44568	2.12296	2.03341	2.65168	4.58784	19.3004	7.31153	0.000297623	1.40677	up
AT2G24600	AT2G24600	1.33052	1.28014	2.08952	4.86154	8.6202	4.75964	3.62065e-09	1.64453	up
AT1G12950	AT1G12950	0.91057	0.486164	0.791382	2.24167	6.97612	4.50046	3.14507e-08	1.89529	up
AT1G21540	AT1G21540	0.778852	0.513784	0.923562	0.222203	0.33837	0.252793	0.00310816	-1.07362	down
AT2G16980	AT2G16980	0.798593	0.434222	0.597794	1.72827	4.13559	3.03668	1.12465e-06	1.63866	up
AT3G04530	AT3G04530	1.76168	2.5986	2.35564	4.64817	4.58322	5.90142	1.2188e-05	1.046	up
AT3G03650	AT3G03650	0.244108	0.208049	0.185697	0.957102	1.06575	0.944516	6.03219e-10	1.79358	up
AT2G23050	AT2G23050	1.08963	0.416764	0.643428	1.88576	4.64802	1.59779	0.00242488	1.2188	up
AT1G57590	AT1G57590	1.5874	1.51795	1.38085	4.65185	3.95534	3.61114	1.25749e-09	1.31217	up
AT5G39860	AT5G39860	11.0572	10.7893	8.78889	4.19389	3.62331	4.35419	1.69378e-08	-1.21976	down
AT1G74830	AT1G74830	0.06054	0.016674	0.110259	0.534582	1.38088	0.735858	5.45063e-07	1.93999	up
AT5G53250	AT5G53250	3.35168	2.16886	1.64578	8.65528	34.3901	16.3363	6.41705e-08	1.96953	up
AT5G25440	AT5G25440	2.83505	2.17187	4.81985	5.91151	12.9782	6.08791	0.00485839	1.02613	up
AT2G11810	AT2G11810	0.59245	1.02151	0.556997	4.00542	5.99118	4.40039	3.11597e-16	2.24733	up
AT1G61255	AT1G61255	3.13809	4.07613	4.91081	0.843172	1.86545	1.91567	0.00303826	-1.06188	down
AT2G18150	AT2G18150	6.02478	4.79591	3.47048	10.5918	26.6441	14.7671	9.13194e-06	1.44087	up
AT3G29000	AT3G29000	1.13321	0.15648	0.742873	3.42906	7.82344	2.32868	0.00186853	1.3051	up
AT1G29025	AT1G29025	0.817833	0.656023	1.35549	1.33447	6.61053	2.43375	0.00572243	1.14969	up
AT2G33790	AT2G33790	2.51309	0.625739	1.18298	5.11351	14.7984	7.67579	2.5456e-05	1.62567	up
AT2G39420	AT2G39420	6.21356	5.53066	6.00992	10.7258	16.5314	12.1009	1.7646e-07	1.05567	up
AT5G24780	AT5G24780	8.50762	7.30047	7.18904	14.5875	14.2638	20.4444	4.54808e-06	1.00116	up
AT2G03720	AT2G03720	0.994155	0.731173	0.832516	2.44605	10.5793	4.33085	5.45926e-06	1.71932	up
AT2G32487	AT2G32487	4.19132	3.62109	4.53728	10.4981	8.99202	12.5538	5.2067e-08	1.23846	up
AT4G25790	AT4G25790	0.791485	0.855596	0.789269	2.35234	9.31698	5.50387	2.69658e-07	1.86403	up
AT1G79310	AT1G79310	0.690054	0.493472	0.625568	1.14373	2.40391	1.62926	0.00066642	1.16406	up
AT2G48140	AT2G48140	2.27501	1.7175	2.12908	5.35279	5.24908	5.13516	5.49551e-09	1.24001	up
AT2G42570	AT2G42570	3.75063	2.75451	3.7569	5.38824	11.3569	7.18095	0.000564989	1.02459	up
AT3G48340	AT3G48340	2.85369	1.61303	1.63152	9.64566	31.8051	19.7452	7.13894e-13	2.38728	up
AT1G80440	AT1G80440	23.3516	24.4557	20.149	49.5047	34.696	69.0723	0.000162933	1.02096	up
AT3G54770	AT3G54770	1.10097	1.35726	0.700014	2.85743	9.38721	5.59703	2.52229e-06	1.70109	up
AT5G66390	AT5G66390	5.09801	4.8263	4.83857	9.64586	17.8633	9.88784	1.12971e-05	1.15846	up
AT5G04120	AT5G04120	0.550372	0.1229	0.32341	3.12195	7.17523	5.04507	3.75028e-12	2.47395	up
AT4G04630	AT4G04630	3.9245	3.44192	2.95995	7.22305	5.90186	10.0183	0.000297269	1.00183	up
AT5G39110	AT5G39110	0.122978	0.441924	0.51914	3.68982	5.65431	3.8502	1.21291e-13	2.49807	up
AT1G66270	AT1G66270	17.2744	8.77431	11.5084	35.0537	136.176	52.0552	0.00282795	1.26247	up
AT4G19420	AT4G19420	30.255	31.158	23.0399	66.785	69.7146	63.5078	1.02141e-10	1.15694	up
AT2G47530	AT2G47530	0.297655	0.407026	0.284749	1.4111	3.51022	3.41949	6.40721e-08	1.96188	up
AT5G18130	AT5G18130	6.93072	8.51059	9.00911	20.4323	19.3408	13.5162	1.04401e-06	1.02917	up
AT2G32210	AT2G32210	0.906547	0.916307	0.824527	7.32407	7.35284	5.53568	9.00241e-23	2.48703	up
AT3G32030	AT3G32030	0.728912	0.344173	0.55211	1.45051	3.44611	1.60932	0.000161758	1.39134	up
AT4G12400	AT4G12400	16.4524	23.514	31.8336	9.01805	7.96444	9.33479	1.0562e-08	-1.29794	down
AT3G22750	AT3G22750	6.46436	7.66419	9.9755	1.32918	2.81948	1.70391	9.23105e-11	-1.73877	down
AT1G02810	AT1G02810	3.1424	2.47128	3.29295	5.26861	17.3697	6.7805	0.000425034	1.26538	up
AT5G62920	AT5G62920	9.59676	10.9001	8.47469	3.62611	4.8717	4.68096	4.30396e-07	-1.05668	down
AT4G28850	AT4G28850	1.02532	0.554625	1.04268	5.29661	22.6138	11.2394	3.72363e-13	2.55313	up
AT2G43535	AT2G43535	14.348	10.3553	13.5331	17.5811	57.5475	36.5364	0.000670494	1.17891	up
AT1G44970	AT1G44970	1.21136	0.858981	0.810203	2.31453	5.86154	2.83622	6.51331e-05	1.40526	up
AT1G19230	AT1G19230	0.906311	0.656589	0.776007	1.65518	3.97429	2.11802	2.40831e-05	1.35721	up
AT1G56150	AT1G56150	6.71885	5.55871	4.31422	0.344695	0.366143	2.11521	0.0024245	-1.27807	down
AT5G06320	AT5G06320	22.2218	20.5889	31.9512	56.2366	119.326	54.3398	5.90703e-06	1.34269	up
AT3G12145	AT3G12145	8.09072	4.68335	5.05244	11.7746	18.7042	15.1137	4.15271e-05	1.14637	up
AT3G51760	AT3G51760	4.36506	5.70696	4.97422	2.41541	2.03767	2.5713	2.54375e-06	-1.00422	down
AT5G09530	AT5G09530	4.53622	6.2079	5.66218	11.7933	12.5349	10.3065	4.26949e-09	1.01913	up
AT3G46230	AT3G46230	8.15231	20.7467	29.3182	5.82647	2.29216	3.65869	3.61011e-05	-1.53846	down
AT5G42590	AT5G42590	3.06843	2.46649	2.95781	5.07078	7.48901	8.90783	1.30328e-06	1.18304	up
AT1G45145	AT1G45145	22.668	18.6361	19.126	31.3846	75.9123	36.7254	0.00137826	1.01759	up
AT1G17960	AT1G17960	1.99541	3.66833	5.18269	0.960779	1.63081	0.75877	0.000505872	-1.24803	down
AT3G60280	AT3G60280	0.335767	0.146598	0.373084	1.20447	4.35737	2.5281	1.16677e-06	1.85567	up
AT5G54370	AT5G54370	4.56666	3.2827	4.92567	10.3266	45.7916	24.6013	8.74059e-08	1.86967	up
AT4G27480	AT4G27480	0.46989	0.619404	0.727154	1.70117	2.65113	1.81502	1.19113e-07	1.47467	up
AT2G39110	AT2G39110	1.53525	1.82272	1.91724	3.78859	9.70902	4.91578	6.65756e-06	1.42827	up
AT5G19110	AT5G19110	0.62275	0.189242	0.42577	0.867955	5.70021	1.62777	0.00241535	1.27902	up
AT5G12020	AT5G12020	9.23817	27.2547	35.6075	3.98177	1.23141	2.97391	1.19113e-07	-1.96019	down
AT5G27000	AT5G27000	0.689754	0.739208	0.974469	1.66886	2.41946	1.82081	2.44113e-07	1.17354	up
AT5G35190	AT5G35190	0.63717	0.570749	0.974788	4.65398	16.0908	9.59314	1.87871e-15	2.66045	up
AT3G11430	AT3G11430	0.389709	0.423354	0.507949	1.1689	1.27394	1.00965	5.97647e-06	1.20223	up
AT2G22970	AT2G22970	8.89494	8.24173	8.62619	14.0447	23.9542	17.2398	3.03675e-06	1.00344	up
AT1G67865	AT1G67865	31.692	30.4149	20.0522	75.4786	44.0673	76.7064	0.000445016	1.05171	up
AT1G04580	AT1G04580	0.056427	0.111876	0.135049	0.738027	0.418753	0.324357	5.35231e-05	1.52546	up
AT5G13910	AT5G13910	1.79342	1.38825	1.8824	3.65323	8.16058	5.0353	3.10824e-05	1.35869	up
AT5G61550	AT5G61550	0.264032	0.378942	0.300427	0.795643	1.5699	0.978064	6.37696e-06	1.43566	up
AT1G30280	AT1G30280	1.11301	0.850995	1.52473	2.74904	3.62807	3.07345	6.61663e-07	1.26312	up
AT4G21830	AT4G21830	1.84779	1.52413	1.61777	3.48998	16.4348	5.65785	0.000141929	1.47907	up
AT5G41040	AT5G41040	5.22743	6.52543	6.4765	14.3483	13.5924	12.2304	5.66435e-13	1.0905	up
AT1G69530	AT1G69530	217.174	250.685	227.806	54.5863	109.028	94.0653	4.06655e-08	-1.29167	down
AT5G55250	AT5G55250	5.02293	3.7199	2.89437	27.3775	15.054	27.6167	1.37461e-13	2.11772	up
AT4G15393	AT4G15393	1.85369	1.76257	2.94293	4.65413	12.6255	8.21182	1.62304e-06	1.53499	up
AT5G13150	AT5G13150	0.426007	0.389568	0.465053	0.961542	2.39282	1.21588	9.38784e-05	1.35831	up
AT3G02550	AT3G02550	1.43094	1.78032	1.65937	3.86694	11.6744	3.68065	0.000164357	1.38826	up
AT5G22410	AT5G22410	1.48944	0.910747	1.25177	4.75412	19.0297	10.4418	1.18186e-10	2.22848	up
AT1G18300	AT1G18300	3.11518	2.84774	4.99126	6.60163	16.8762	8.0463	0.000699157	1.17459	up
AT2G34020	AT2G34020	0.443297	0.144793	0.216415	1.05037	4.14658	1.36089	3.3197e-05	1.6423	up
AT1G12010	AT1G12010	0.786934	0.505652	0.847804	1.90468	2.5456	1.52307	0.000198151	1.18925	up
AT5G22460	AT5G22460	17.9704	20.1239	21.7279	39.6824	36.1558	50.9692	4.67209e-09	1.02661	up
AT2G22810	AT2G22810	0.252662	0.197246	0.147568	0.78078	2.04834	0.765503	8.13032e-05	1.54158	up
AT4G00080	AT4G00080	1.00122	0.8856	0.977607	3.04209	9.56893	5.36482	3.13798e-08	1.89243	up
AT2G14820	AT2G14820	0.289527	0.087782	0.149312	0.560814	1.67872	1.11726	9.77925e-05	1.54082	up
AT1G69490	AT1G69490	18.9582	20.6536	12.3566	52.3057	30.2297	49.9659	0.000111203	1.13403	up
AT1G01580	AT1G01580	1.57717	1.48231	2.61374	0.822422	0.81159	0.704877	8.51243e-05	-1.08879	down
AT3G05390	AT3G05390	0.3922	0.531348	0.575572	1.87279	2.10393	1.46678	3.79133e-09	1.58289	up
AT5G03670	AT5G03670	3.14979	2.89364	4.18916	6.12195	8.99601	7.65277	2.80166e-07	1.06433	up
AT2G20720	AT2G20720	1.64546	2.12033	2.73881	0.904538	0.972564	0.98633	1.03865e-05	-1.05597	down
AT1G65510	AT1G65510	0.84038	1.04809	1.30164	2.84027	7.47316	3.39755	0.00013785	1.42625	up
AT1G73550	AT1G73550	1.16152	0.75657	0.800581	2.49365	2.9415	3.45308	0.000127507	1.28853	up
AT1G04490	AT1G04490	0.388355	0.188797	0.230313	0.890317	1.32608	0.871055	0.0006761	1.27036	up
AT1G12040	AT1G12040	0.471284	0.685344	0.783821	2.12373	8.45037	4.10675	7.89975e-09	2.01973	up
AT3G22620	AT3G22620	10.3583	12.4823	8.87992	27.3752	26.8677	24.2514	1.87506e-10	1.2124	up
AT1G49390	AT1G49390	0.46302	0.544385	0.476751	0.935023	1.6954	1.35018	0.00129648	1.10379	up
AT2G36120	AT2G36120	28.5611	33.2945	37.3136	72.9201	123.997	74.4519	2.8702e-09	1.31437	up
AT2G30340	AT2G30340	0.64085	0.542546	0.67385	1.59511	4.11585	1.64105	0.000426241	1.33748	up
AT1G32350	AT1G32350	0.735996	0.97181	1.35242	7.06439	6.4023	1.49654	0.000266621	1.43588	up
AT1G73340	AT1G73340	0.35837	0.214697	0.497164	0.684597	1.72022	0.927422	0.00710117	1.08616	up
AT2G02120	AT2G02120	5.0996	2.72328	3.52451	0.570599	1.87442	0.445351	0.00702162	-1.14372	down
AT2G47140	AT2G47140	0.834011	0.803325	1.01791	2.2467	4.60222	2.70854	3.122e-06	1.46639	up
AT1G62570	AT1G62570	8.64675	8.92173	9.61267	17.619	23.3964	18.9804	3.2303e-15	1.09706	up
AT2G24550	AT2G24550	19.253	16.9571	18.2275	37.5015	40.1133	44.9589	8.36911e-17	1.12618	up
AT2G38790	AT2G38790	1.20866	1.13825	1.41141	4.53217	3.07155	4.73214	1.97664e-08	1.47844	up
AT2G45750	AT2G45750	1.76966	0.940494	1.0662	3.76379	8.40234	6.23959	1.69248e-08	1.77392	up
AT5G43890	AT5G43890	0.332755	0.415	0.422731	1.17568	1.31808	1.52109	8.64996e-07	1.45175	up
AT5G39120	AT5G39120	0.409943	0.692878	0.716461	6.97529	10.7381	6.84717	1.45416e-28	3.04308	up
AT1G53830	AT1G53830	2.47378	2.02794	1.46568	5.62844	10.9303	7.69886	3.93894e-09	1.66898	up
AT1G72520	AT1G72520	1.64049	1.9635	1.72499	4.32968	7.02354	3.30378	9.01459e-06	1.23836	up
AT2G46070	AT2G46070	17.9785	22.5383	18.4387	8.91536	5.53947	9.55099	5.07492e-06	-1.1463	down
AT2G14210	AT2G14210	0.559981	0.629829	0.255955	1.74475	2.07465	1.32942	0.000597379	1.27844	up
AT4G16780	AT4G16780	7.42232	6.84377	11.3888	19.4378	16.2377	24.6252	7.94848e-06	1.10602	up
AT5G58010	AT5G58010	1.04257	0.714087	0.832224	2.41097	7.63607	4.99394	2.67752e-07	1.79158	up
AT1G14170	AT1G14170	3.29751	2.68022	3.40218	4.82986	13.6442	6.08069	0.00241011	1.05726	up
AT3G14210	AT3G14210	284.161	220.781	245.167	1037.54	884.148	1057.49	1.5684e-31	1.88169	up
AT1G54000	AT1G54000	14.784	12.3964	15.7119	23.4822	71.536	32.7718	0.000206944	1.23098	up
AT3G49960	AT3G49960	2.59456	2.1766	1.91343	11.2823	36.9076	26.3015	3.26514e-17	2.63164	up
AT1G10560	AT1G10560	0.254241	0.147241	0.188197	0.380971	0.845052	0.737033	0.00176827	1.19236	up
AT5G60900	AT5G60900	0.178632	0.417083	0.355397	1.11553	1.86352	0.717928	0.000479722	1.32942	up
AT2G28120	AT2G28120	2.23212	1.99179	2.94213	4.36505	7.5779	4.866	3.18146e-05	1.07977	up
AT2G39330	AT2G39330	4.9142	3.03787	2.93104	14.6966	19.3028	25.1552	1.17417e-14	2.05686	up
AT4G22235	AT4G22235	1.50812	0.688619	1.23328	2.00847	10.1315	4.08683	0.00241317	1.26186	up
AT1G76960	AT1G76960	16.8752	15.9455	10.4166	44.6607	28.0984	31.8703	0.00026198	1.07206	up
AT4G16260	AT4G16260	36.3038	56.5185	69.8489	107.672	281.592	96.4374	0.000797097	1.19115	up
AT3G48520	AT3G48520	0.249721	0.478525	0.544704	0.983096	3.1604	1.75074	0.000120525	1.46198	up
AT4G11780	AT4G11780	0.268685	0.232915	0.098563	0.817441	2.42915	0.968054	8.32852e-05	1.56399	up
AT4G14400	AT4G14400	11.076	7.52417	9.46209	21.0655	22.8146	23.5664	1.30825e-10	1.1805	up
AT5G45960	AT5G45960	4.74202	5.31897	5.19593	2.08551	1.48689	2.46929	9.10029e-07	-1.19056	down
AT5G13900	AT5G13900	0.41294	0.741949	0.399137	2.17368	2.39676	1.95825	1.67973e-05	1.50334	up
AT3G13130	AT3G13130	2.74751	3.61364	2.89108	0.64505	0.462786	0.738859	3.58676e-11	-1.90478	down
AT5G47530	AT5G47530	0.362636	0.739726	0.574823	1.61343	1.73926	1.68457	1.95708e-05	1.29587	up
AT1G74500	AT1G74500	1.76908	0.902887	1.10013	2.52366	8.69921	3.8744	0.0024245	1.22994	up
AT4G33730	AT4G33730	0.480158	0.563278	0.481802	2.21642	6.29015	3.76678	4.43603e-08	1.9713	up
AT3G59370	AT3G59370	1.81239	0.567269	0.578678	2.2659	7.38072	5.5626	0.00226049	1.27563	up
AT1G52060	AT1G52060	2.06219	2.02526	2.20191	3.64779	21.4722	8.88832	7.99739e-05	1.52664	up
AT2G04050	AT2G04050	10.5127	19.9068	33.5828	8.08873	7.87014	8.02178	0.000682286	-1.11727	down
AT3G43270	AT3G43270	6.04606	5.45126	5.81788	12.8078	14.5004	14.0032	1.17401e-24	1.21572	up
AT2G25510	AT2G25510	139.99	97.2473	130.964	286.095	595.162	329.97	5.2067e-08	1.45483	up
AT1G33800	AT1G33800	4.89751	3.69181	5.49513	10.5324	26.1874	16.4468	1.01566e-07	1.56771	up
AT3G28740	AT3G28740	7.1302	11.3387	9.19094	3.47037	1.95455	2.8554	3.23207e-08	-1.48618	down
AT3G47210	AT3G47210	0.328514	0.359991	0.46079	0.873998	2.14406	0.787385	0.00255928	1.17542	up
AT1G75490	AT1G75490	5.59118	6.4195	5.14688	12.2263	9.86354	18.8076	9.58017e-05	1.07895	up
AT4G09990	AT4G09990	1.44491	1.10214	1.51109	3.20908	8.31946	5.56911	4.00678e-07	1.61627	up
AT1G72200	AT1G72200	2.62389	2.28226	2.53652	5.07801	5.26957	5.28187	1.80021e-10	1.01664	up
AT4G35985	AT4G35985	1.70956	2.09221	2.2218	4.05056	5.35641	4.39092	2.73168e-08	1.10689	up
AT4G26010	AT4G26010	5.20509	4.01174	6.23979	14.954	65.202	32.6358	3.54091e-09	2.03135	up
AT2G25240	AT2G25240	0.48859	0.332599	0.593483	1.68429	6.71739	3.33123	9.34672e-08	1.95505	up
AT3G12540	AT3G12540	0.370765	0.215638	0.171439	0.590104	2.2387	1.55167	0.000212302	1.47367	up
AT5G06640	AT5G06640	0.299845	0.532151	0.46687	2.20404	10.9949	6.82517	2.07879e-12	2.5062	up
AT1G12560	AT1G12560	2.72783	1.24712	2.17619	6.44045	23.7051	12.1758	1.15693e-07	1.89007	up
AT5G39180	AT5G39180	0.198182	0.775646	0.695404	1.81859	2.74359	1.63009	0.003886	1.17935	up
AT3G61270	AT3G61270	1.21759	0.924089	1.04138	2.17888	4.15498	2.98623	4.74816e-06	1.29969	up
AT1G79770	AT1G79770	8.27001	7.84431	8.43704	3.2729	3.11882	3.10565	1.21291e-13	-1.28856	down
AT5G23190	AT5G23190	0.429203	0.694394	0.433469	1.69515	1.63316	1.27636	1.03256e-05	1.29402	up
Arabidopsis_thaliana_newGene_987	--	0.376315	0.16542	0.247663	0.796584	1.36127	1.19668	5.4457e-06	1.54556	up
AT5G61260	AT5G61260	0.44287	0.537449	0.719174	1.12166	1.75565	1.18281	0.00172237	1.02139	up
AT5G59090	AT5G59090	2.91737	3.16511	3.65335	9.48683	15.4575	8.84419	1.15525e-12	1.60903	up
AT3G20380	AT3G20380	1.42813	3.12584	2.39788	3.87965	10.3641	4.553	0.00719749	1.03318	up
AT2G35770	AT2G35770	0.79408	0.480713	0.691198	1.63793	2.08049	1.53563	6.77732e-05	1.17969	up
AT2G07671	AT2G07671	1.28686	0.621728	0.673319	5.84124	2.13749	2.34856	0.00702162	1.14573	up
AT4G25000	AT4G25000	0.348041	0.180827	0.474968	9.16907	11.1519	3.41202	1.14621e-18	3.01778	up
AT2G36590	AT2G36590	3.48202	4.62975	4.51373	2.09529	0.989905	1.74384	0.000237421	-1.13469	down
AT1G17710	AT1G17710	1.35678	2.28798	1.17745	13.6339	8.93539	9.95755	7.39193e-16	2.27191	up
AT3G18200	AT3G18200	1.00027	0.563784	1.03047	2.55644	6.95283	4.70518	9.55694e-08	1.79622	up
AT2G25940	AT2G25940	0.847737	0.811425	1.0071	1.71887	2.945	1.6497	0.000742113	1.03448	up
AT5G11610	AT5G11610	1.68021	1.47292	1.90021	3.58925	3.86352	4.04417	5.17808e-11	1.11548	up
AT4G15160	AT4G15160	1.11269	0.698467	0.86952	1.32866	3.60185	2.68722	0.00476876	1.07453	up
AT2G30395	AT2G30395	0.472515	0.533379	0.585047	1.14597	4.04566	1.57734	0.00168669	1.27279	up
AT5G44610	AT5G44610	4.57094	3.3511	4.4016	11.8128	30.4558	18.7044	6.27093e-10	1.85063	up
AT3G55240	AT3G55240	12.4012	9.43733	6.97041	22.7638	45.3602	40.9942	1.09323e-07	1.56239	up
AT2G43670	AT2G43670	0.624057	0.870876	0.600686	2.52949	1.88121	1.58669	0.00339175	1.09933	up
AT2G25150	AT2G25150	0.315263	0.182693	0.033886	1.15426	2.87329	1.50038	1.32263e-05	1.72055	up
AT1G65890	AT1G65890	2.01347	2.70222	2.04066	6.12418	3.47242	6.12438	0.000455693	1.03219	up
AT1G36060	AT1G36060	2.53131	3.17828	5.28472	6.72549	19.3351	12.0999	4.96239e-05	1.37652	up
AT2G29750	AT2G29750	3.2898	2.48332	2.56458	5.63932	9.63657	7.02079	3.98669e-07	1.24609	up
Arabidopsis_thaliana_newGene_115	--	2.08778	2.24659	2.78311	4.98677	5.12019	5.20822	2.49882e-09	1.02153	up
AT4G14365	AT4G14365	3.81625	2.79165	3.72371	8.8359	20.2437	8.65663	2.51424e-06	1.48082	up
AT4G37770	AT4G37770	0.183543	0.137248	0.74084	1.08143	1.95897	2.65294	0.00141529	1.32484	up
AT3G23120	AT3G23120	0.378338	0.216786	0.634829	1.54527	2.12956	1.2232	2.69109e-05	1.47113	up
AT1G01560	AT1G01560	0.448547	0.283558	0.541976	1.69771	2.40925	1.35549	1.72338e-06	1.56453	up
AT1G13970	AT1G13970	1.43592	1.10644	1.7187	2.92851	4.37092	3.04313	6.22207e-06	1.13108	up
AT1G77330	AT1G77330	9.23659	5.83765	7.72566	13.721	40.8767	21.0263	7.9127e-05	1.32598	up
AT3G12500	AT3G12500	34.3773	41.1291	44.3097	75.5448	138.132	72.2035	1.63697e-05	1.10222	up
AT5G08760	AT5G08760	26.759	21.288	28.2863	52.7408	86.3465	60.0236	1.04321e-08	1.25294	up
AT5G42600	AT5G42600	2.03434	0.826273	1.01393	3.4287	2.84263	6.67077	0.00132663	1.2165	up
AT1G30870	AT1G30870	4.75892	3.45251	3.99056	13.1356	43.2707	23.1635	1.36744e-10	2.05362	up
AT4G30320	AT4G30320	1.35354	0.988494	0.68171	3.19681	12.2674	5.39337	1.44391e-05	1.66999	up
AT1G18400	AT1G18400	8.50609	6.98395	7.78768	14.7406	19.8312	24.1516	3.13798e-08	1.20899	up
Arabidopsis_thaliana_newGene_100	--	1.56711	1.44089	1.6491	0.53517	0.62554	0.741169	4.59793e-06	-1.07115	down
AT4G23700	AT4G23700	1.24341	1.76446	2.72519	5.46662	6.25705	3.41661	0.000185269	1.16083	up
AT1G52040	AT1G52040	3.96933	1.50019	1.62518	9.71489	10.5714	10.7591	1.24088e-06	1.60737	up
AT3G28340	AT3G28340	0.695099	0.632725	1.92733	2.30503	9.88692	1.93828	0.00998765	1.11806	up
AT3G49570	AT3G49570	5.10443	3.12565	4.19807	23.1793	5.08285	38.9679	0.000701519	1.38316	up
AT3G56710	AT3G56710	1.39514	0.974233	1.91551	3.49423	4.22897	6.51473	3.18886e-05	1.35889	up
AT4G08400	AT4G08400	0.36962	0.404447	0.463041	1.79695	5.92821	3.33218	5.17808e-11	2.23091	up
AT2G04170	AT2G04170	2.95773	2.13825	2.86216	3.95179	12.4484	6.29182	0.00140258	1.13552	up
AT3G48360	AT3G48360	17.4263	18.6739	14.6504	5.64706	8.22357	9.52114	1.67742e-05	-1.01833	down
AT3G48700	AT3G48700	5.94604	5.99138	7.82485	2.97704	3.01739	3.10948	1.25749e-09	-1.05219	down
AT4G37260	AT4G37260	4.31686	3.97319	5.17165	7.66402	13.0943	10.4587	1.48116e-06	1.09572	up
AT5G65160	AT5G65160	0.738179	0.771919	0.637876	1.27467	3.30099	1.86764	0.000411725	1.2093	up
AT3G25780	AT3G25780	3.18808	3.17159	5.1538	6.82063	20.7375	8.05029	0.0013633	1.1849	up
AT2G43610	AT2G43610	7.89261	6.675	7.69917	13.8329	30.2025	16.9849	1.1051e-05	1.23103	up
AT5G25240	AT5G25240	3.41706	3.1543	2.86916	8.50675	5.91849	8.48797	2.78663e-05	1.10972	up
AT1G07135	AT1G07135	0.995509	0.310533	1.57606	2.36434	11.7141	2.42595	0.00747886	1.15442	up
AT2G40435	AT2G40435	3.95524	2.24802	2.13237	12.9008	12.3967	8.9574	8.95351e-09	1.66925	up
AT4G25160	AT4G25160	0.284709	0.087806	0.09421	0.470873	0.867681	0.680403	0.00262679	1.2405	up
AT3G12580	AT3G12580	170.852	292.457	407.645	101.852	70.0014	90.1654	1.15693e-07	-1.45726	down
AT1G13340	AT1G13340	3.20312	2.28399	2.84488	5.40456	11.6314	4.4854	0.00247491	1.05586	up
AT1G56430	AT1G56430	31.6436	31.9109	37.7452	13.4341	11.5903	12.8878	1.01384e-25	-1.36731	down
AT2G29500	AT2G29500	11.7933	29.4507	36.3948	6.36524	5.90619	6.07978	2.58578e-07	-1.62582	down
AT1G01660	AT1G01660	0.215316	0.585855	0.471303	0.804065	2.13618	1.31176	0.00442545	1.14607	up
AT1G62420	AT1G62420	8.8753	7.70641	9.49072	3.93637	2.90882	3.19565	5.16075e-10	-1.26612	down
AT5G03640	AT5G03640	0.196645	0.227025	0.225722	0.713141	1.95207	1.24441	1.49775e-08	1.89819	up
AT5G19240	AT5G19240	39.4878	29.263	36.8709	66.2001	88.0169	79.9211	1.64826e-09	1.07534	up
AT1G63530	AT1G63530	0.771678	0.893709	1.07397	2.25759	3.43066	1.73436	5.97589e-05	1.19476	up
AT1G19900	AT1G19900	0.872326	0.553961	1.30551	3.0493	7.85261	5.75983	4.40084e-09	1.93959	up
AT3G57260	AT3G57260	0.837237	0.49828	0.627337	6.06181	9.69061	2.88615	6.64671e-11	2.24756	up
AT3G22600	AT3G22600	15.5854	15.2561	15.0845	30.4014	59.5319	28.5711	3.28504e-05	1.16098	up
AT1G60095	AT1G60095	0.467461	0.583507	0.599686	1.27585	2.82307	1.15257	0.000750423	1.22205	up
AT3G03500	AT3G03500	0.821514	0.578504	0.728266	1.55889	3.89401	2.64347	0.00012825	1.37713	up
AT4G27400	AT4G27400	0.391993	0.303702	0.230359	0.876592	3.6328	1.73747	8.40418e-05	1.5567	up
AT3G30720	AT3G30720	1.91012	1.51049	1.19426	23.6243	33.1841	18.5111	8.54997e-39	3.36231	up
AT1G18830	AT1G18830	0.6503	1.40498	0.639679	0.150364	0.143147	0.187303	7.72066e-07	-1.74481	down
AT5G51060	AT5G51060	1.06413	1.3142	1.1438	2.34165	7.09996	3.74358	8.60639e-06	1.46365	up
AT2G46970	AT2G46970	0.350008	0.348598	0.439478	1.30725	1.84153	3.08834	3.60709e-08	1.82821	up
AT3G17420	AT3G17420	4.1849	3.83389	4.28522	7.64746	14.3366	10.2138	1.26264e-07	1.23691	up
AT2G19060	AT2G19060	0.131624	0.094771	0.214957	0.534287	1.43363	0.623541	9.0017e-05	1.53167	up
AT1G05240	AT1G05240	3.51014	3.34281	3.73104	9.15553	52.4419	20.2331	0.000500944	1.4324	up
AT1G03495	AT1G03495	13.8943	15.6152	17.8245	7.42653	5.84582	8.97555	1.07168e-06	-1.00389	down
AT2G36750	AT2G36750	2.03646	4.40338	7.38579	2.13679	1.09405	0.716786	0.00594977	-1.13176	down
AT3G10710	AT3G10710	1.57846	0.663799	1.06555	4.17192	15.5829	7.73573	1.71466e-08	2.02052	up
AT5G04970	AT5G04970	0.425975	0.499537	0.354082	0.655591	2.22309	1.08098	0.00787047	1.07481	up
AT1G26360	AT1G26360	0.219797	0.306104	0.241125	0.67487	1.64311	1.17083	5.30335e-05	1.48271	up
AT3G57520	AT3G57520	32.1938	51.4156	44.5628	17.7199	21.7101	14.0218	3.52717e-07	-1.14539	down
AT1G73260	AT1G73260	34.6893	37.9633	45.1231	124.902	183.819	62.2153	1.69672e-05	1.33948	up
AT5G66280	AT5G66280	2.55258	2.01558	2.20947	4.0528	12.1409	6.51275	7.64286e-05	1.33172	up
AT1G05340	AT1G05340	1.87937	1.56335	2.02558	7.27419	5.10885	5.75629	2.25623e-09	1.51191	up
AT5G25840	AT5G25840	41.6065	46.6449	42.5719	21.7793	13.9784	23.3152	1.02547e-05	-1.03465	down
AT3G55980	AT3G55980	6.60367	4.88526	12.1457	16.9368	33.9509	16.7724	0.000455693	1.19014	up
AT3G44300	AT3G44300	58.9298	57.3182	73.5704	197.274	308.491	82.4003	0.000344584	1.24379	up
AT1G74810	AT1G74810	4.04166	5.2561	4.95494	2.26107	1.22406	2.43259	0.000290159	-1.06749	down
AT1G14240	AT1G14240	2.18784	1.36841	1.37629	2.92878	8.02211	5.34374	0.000218025	1.28505	up
AT5G12940	AT5G12940	4.13279	2.77756	2.46198	8.50115	15.1147	13.1228	3.62065e-09	1.64034	up
AT1G16130	AT1G16130	0.684456	0.569605	0.881993	1.47091	2.8471	1.17279	0.00316613	1.04726	up
AT1G49570	AT1G49570	2.42783	2.77093	7.40276	18.9895	41.0471	20.8852	1.82293e-08	1.9349	up
AT1G19940	AT1G19940	0.409097	0.519361	0.493079	0.860425	2.16346	1.40787	0.000550342	1.22363	up
AT4G12520	AT4G12520	8.83745	5.33635	6.35033	15.9468	37.3248	25.4557	3.26329e-07	1.55436	up
AT2G47270	AT2G47270	5.48993	7.43096	5.29076	14.369	14.8036	19.2529	4.06655e-08	1.26384	up
AT5G45280	AT5G45280	18.0682	16.022	16.2167	32.8729	52.5593	42.5652	9.26264e-11	1.24415	up
AT5G13580	AT5G13580	0.424734	0.917622	0.642285	2.36828	1.77694	2.00178	9.98701e-06	1.33943	up
AT1G17170	AT1G17170	55.1979	50.9298	73.553	17.3185	32.0418	10.3118	0.000149065	-1.25586	down
AT5G01330	AT5G01330	0.387053	0.293884	0.447962	0.560405	1.95267	1.03042	0.00753205	1.08424	up
AT2G37670	AT2G37670	0.165642	0.306821	0.356482	0.530426	0.989241	0.700681	0.00323734	1.07144	up
AT3G56980	AT3G56980	40.693	21.9117	28.0675	15.0963	9.53923	4.35423	0.0015814	-1.18487	down
AT5G62310	AT5G62310	0.1761	0.436384	0.295728	0.635835	1.71076	1.12761	0.000376003	1.33493	up
AT1G24320	AT1G24320	0.408178	0.270457	0.580281	0.892114	2.08486	1.04365	0.00115257	1.2065	up
AT1G33055	AT1G33055	0.308756	0.423231	0.257416	0.93126	2.25042	1.39006	3.98532e-05	1.50492	up
AT1G71330	AT1G71330	8.00539	9.97423	9.19252	3.56963	2.7548	4.14055	1.42648e-08	-1.25195	down
AT1G43020	AT1G43020	0.575353	0.485136	0.473893	1.21605	1.88373	0.900453	0.00375574	1.03941	up
AT4G16680	AT4G16680	3.23656	5.84066	5.6321	1.51282	0.969834	1.20148	2.36253e-10	-1.69448	down
AT5G38700	AT5G38700	0.548631	0.398012	0.327913	1.28854	5.39959	2.27926	5.20189e-05	1.59577	up
AT1G26970	AT1G26970	0.226611	0.130875	0.251917	0.716425	1.68647	0.833775	2.6876e-05	1.5749	up
AT1G74670	AT1G74670	131.454	112.174	97.7425	21.7673	54.7426	56.806	0.000579064	-1.11348	down
AT1G35310	AT1G35310	7.27947	8.09797	12.0462	1.02604	1.20216	1.6081	2.41664e-22	-2.43639	down
AT3G43960	AT3G43960	3.52039	2.57711	3.11183	4.18847	9.95362	7.73385	0.00173983	1.01034	up
AT4G29690	AT4G29690	1.85709	0.801399	1.23533	2.91126	10.2476	3.81647	0.000461333	1.36665	up
AT2G46740	AT2G46740	0.805689	0.619829	1.01441	1.58786	4.03919	2.19651	0.00026198	1.26872	up
AT2G39040	AT2G39040	1.14442	0.581371	0.602299	2.31021	8.07241	5.44735	9.17298e-07	1.80348	up
AT5G35480	AT5G35480	3.74035	2.51683	3.22388	11.9836	9.25066	10.3715	1.34765e-08	1.49328	up
AT5G44420	AT5G44420	5.20224	6.36152	16.814	140.232	59.3599	89.4718	5.89546e-12	2.36045	up
AT5G24100	AT5G24100	0.593011	0.25158	0.234242	0.852497	1.66924	0.897163	0.00833856	1.07882	up
AT2G41090	AT2G41090	165.32	123.645	168.323	290.189	380.469	314.514	1.97356e-09	1.0424	up
AT2G02010	AT2G02010	2.23213	1.6819	2.65006	14.0226	7.72424	12.6101	5.70228e-15	2.04664	up
AT1G47400	AT1G47400	81.3138	44.9306	39.4302	29.2029	20.7286	18.9678	0.00164713	-1.03456	down
AT5G47230	AT5G47230	2.53603	1.801	3.92579	5.11332	10.9372	4.96641	0.00502959	1.02386	up
AT2G15390	AT2G15390	2.51654	2.52602	4.02847	6.34366	14.1074	5.87631	0.000120163	1.25447	up
AT1G27740	AT1G27740	0.389928	0.282245	0.245666	1.29606	4.11245	2.79163	1.50427e-08	2.03746	up
AT5G01250	AT5G01250	1.13584	0.848622	1.55539	2.69934	3.52011	2.60701	4.17288e-05	1.13206	up
AT1G79860	AT1G79860	0.249606	0.086736	0.161557	0.614957	1.69809	1.03707	2.16552e-05	1.64245	up
AT1G16850	AT1G16850	1.93655	0.893846	1.48396	3.27908	4.51215	4.58667	0.000250445	1.20084	up
AT3G43110	AT3G43110	0.57216	0.583008	0.583252	4.1985	3.17994	3.21693	5.31099e-16	2.18357	up
AT2G47540	AT2G47540	1.42222	1.5038	1.36649	4.75219	12.535	9.08978	2.3271e-10	2.00071	up
AT4G03210	AT4G03210	37.4968	22.3174	29.3854	51.8919	87.2131	81.9295	1.56787e-05	1.13379	up
AT1G05250	AT1G05250	3.40983	3.0763	5.74678	8.53214	48.0763	19.0224	0.0043624	1.21661	up
AT4G33790	AT4G33790	0.668172	0.876007	1.44055	1.7254	2.90154	4.13305	0.00114339	1.1695	up
AT4G25250	AT4G25250	1.89006	0.913646	0.751567	3.20283	7.5765	4.94486	0.000116428	1.4419	up
AT1G54040	AT1G54040	14.5069	11.0492	7.57756	31.8963	22.5021	36.4056	3.9532e-05	1.20954	up
AT5G24880	AT5G24880	0.308552	0.20342	0.292748	1.10835	2.4075	1.62195	1.65966e-08	1.90905	up
AT5G45210	AT5G45210	0.385863	0.517322	0.350808	0.73664	2.12437	1.22752	0.00146675	1.20036	up
AT1G75620	AT1G75620	0.229967	0.236356	0.137982	0.753927	0.866864	0.522843	0.000414592	1.2981	up
AT1G24145	AT1G24145	4.35637	4.62001	2.80063	12.309	11.3175	12.822	3.96742e-08	1.40904	up
AT4G00970	AT4G00970	1.49379	1.67022	1.63733	4.6293	4.8439	5.45865	4.52236e-23	1.549	up
AT1G13609	AT1G13609	208.512	119.812	112.811	70.5125	40.7925	35.4965	0.000101452	-1.26742	down
AT1G70170	AT1G70170	0.34972	0.364043	0.635651	1.10383	1.90476	0.877378	0.00404353	1.09366	up
AT2G25460	AT2G25460	0.272482	0.355977	0.525621	0.835859	2.01838	0.818864	0.00442545	1.13024	up
AT5G57620	AT5G57620	1.23794	1.24043	0.895639	1.76171	4.97985	3.33485	0.00156172	1.15297	up
AT1G73010	AT1G73010	3.84535	5.31714	4.11083	15.7277	16.2327	15.0125	1.83299e-23	1.71094	up
AT1G08990	AT1G08990	1.31256	1.52119	1.29933	2.57595	4.0159	3.04487	3.91639e-06	1.08845	up
AT5G06730	AT5G06730	0.572131	0.467467	0.473583	1.78822	3.34666	1.75662	1.06457e-07	1.68773	up
AT2G12646	AT2G12646	0.739518	0.303253	0.341435	1.09898	2.91974	1.77167	0.00179856	1.26112	up
AT1G55990	AT1G55990	0.901347	2.13337	1.81976	4.5569	4.1146	4.90678	0.00088613	1.14704	up
AT2G26695	AT2G26695	3.65197	3.54657	3.98161	9.04475	9.2583	7.61744	2.16581e-09	1.13169	up
AT1G31950	AT1G31950	1.12654	0.810247	0.860704	2.1772	4.79398	2.89466	3.74488e-06	1.44496	up
AT3G07970	AT3G07970	0.307972	0.439171	0.240192	1.78851	1.59719	0.974496	1.1051e-05	1.54096	up
AT3G45860	AT3G45860	0.102589	0.054893	0.081955	0.817226	0.590327	0.455644	1.7084e-07	1.8996	up
AT5G67400	AT5G67400	4.51225	3.66644	6.70131	14.0739	64.8818	28.7204	4.1195e-08	1.94964	up
AT2G47550	AT2G47550	0.420338	0.261122	0.757669	1.15054	4.13737	1.74403	0.000414592	1.40471	up
AT1G27670	AT1G27670	0.673524	0.385002	0.476849	1.10427	1.70376	1.78985	0.00139484	1.1606	up
AT2G15042	AT2G15042	0.184278	0.19745	0.222203	0.842287	0.816237	0.563669	1.76311e-05	1.41889	up
AT5G16910	AT5G16910	5.6113	5.70297	6.81938	10.913	17.3755	10.9615	1.39485e-06	1.02164	up
AT5G39610	AT5G39610	18.9554	19.2021	18.7629	49.1967	47.1534	53.1213	7.95273e-32	1.35351	up
AT3G46900	AT3G46900	12.3606	11.1666	10.538	20.4764	31.7146	22.6165	2.24601e-06	1.029	up
AT5G65080	AT5G65080	1.84712	2.0108	2.00431	5.00904	4.06095	4.54423	1.25548e-07	1.1157	up
Arabidopsis_thaliana_newGene_583	--	0.478007	0.658566	0.539116	2.01258	9.15307	4.68202	3.68087e-08	1.98578	up
AT3G19550	AT3G19550	1.68663	2.47885	3.5605	0.93185	0.819415	0.905191	0.000647677	-1.17616	down
AT4G29180	AT4G29180	0.380716	0.272507	0.567453	1.2	4.81647	2.21493	9.66902e-07	1.80344	up
AT2G40610	AT2G40610	51.7139	39.8297	32.2774	8.50242	21.7909	20.7453	0.00235644	-1.03464	down
AT1G66280	AT1G66280	15.1297	10.4864	15.3782	21.482	61.945	24.9204	0.00234458	1.0723	up
AT5G57625	AT5G57625	3.62792	2.78685	3.01891	11.6336	43.9896	21.9628	5.24363e-11	2.19448	up
AT5G08030	AT5G08030	1.72607	1.5	1.19876	3.38221	4.37642	3.67348	1.04013e-06	1.20334	up
AT2G23120	AT2G23120	33.6717	26.5888	26.3253	72.2961	125.937	92.1843	5.29877e-12	1.55731	up
AT5G51270	AT5G51270	0.183783	0.363699	0.220446	0.699084	1.67332	0.955294	5.17645e-05	1.47213	up
AT5G09570	AT5G09570	3.50685	4.42711	5.1156	1.64942	1.8555	1.38769	1.5529e-06	-1.23069	down
AT4G11880	AT4G11880	0.464379	0.192407	0.568552	1.24697	2.73932	1.68119	0.000247311	1.41724	up
AT5G09978	AT5G09978	0.686321	0.726781	1.02323	1.70537	5.1138	2.01631	0.00486467	1.15655	up
AT1G28370	AT1G28370	1.32807	1.33585	2.74194	4.3253	14.8317	4.49074	0.000572207	1.35908	up
AT5G05840	AT5G05840	0.292259	0.268459	0.326196	0.693654	1.39948	0.929375	9.77274e-05	1.33597	up
AT4G29780	AT4G29780	1.36659	1.34532	1.9811	4.994	14.8722	5.49279	1.22935e-07	1.78942	up
AT2G22930	AT2G22930	0.700718	0.576724	0.726604	1.67308	4.48916	2.51958	2.72199e-06	1.58035	up
AT5G10720	AT5G10720	0.365463	0.221401	0.328553	0.765796	1.90333	1.28435	3.122e-06	1.57374	up
AT2G21100	AT2G21100	1.06215	1.27767	0.618412	2.58487	4.49621	3.20458	0.000120808	1.33185	up
AT1G48930	AT1G48930	1.67326	1.19575	1.28341	4.43318	15.6766	7.92147	2.25623e-09	2.00422	up
AT3G23470	AT3G23470	1.94066	1.03536	1.28595	3.73496	11.5401	5.02716	1.24028e-05	1.57064	up
AT1G20620	AT1G20620	194.829	192.578	202.311	359.313	479.77	429.48	2.75676e-17	1.06699	up
AT3G55720	AT3G55720	0.511832	0.55074	0.462202	1.15086	2.28044	2.32363	4.51738e-06	1.48585	up
AT3G62680	AT3G62680	4.02884	2.69982	3.30823	13.7719	51.2558	30.0909	4.13381e-13	2.3764	up
AT2G24610	AT2G24610	0.632201	0.260642	0.507416	1.09014	3.64819	1.59401	0.000344584	1.39562	up
AT5G41750	AT5G41750	0.353913	0.785469	1.11711	2.02324	7.12206	1.52906	0.00141827	1.30562	up
AT3G19680	AT3G19680	4.5989	5.07568	7.21293	13.0989	18.0058	16.1056	1.67718e-12	1.3784	up
AT2G27010	AT2G27010	0.521859	0.862812	0.744423	1.23361	2.40784	1.87719	0.000971671	1.09558	up
AT1G59940	AT1G59940	0.540555	0.234577	0.33789	1.10436	3.90281	2.2606	2.95486e-05	1.62088	up
AT3G25820	AT3G25820	17.6341	21.305	33.0955	9.81202	9.38197	12.6555	2.21662e-05	-1.04099	down
AT4G33985	AT4G33985	0.705286	1.03215	1.02406	2.11904	3.81772	1.70213	0.00475039	1.06481	up
AT4G14370	AT4G14370	0.322244	0.299978	0.707107	1.55507	2.56917	0.768244	0.0014107	1.2556	up
AT2G39430	AT2G39430	2.32667	1.64105	1.80386	3.59194	7.96357	4.60093	0.000272353	1.17718	up
AT2G45220	AT2G45220	2.99235	3.55792	5.11764	11.7835	21.2216	5.15764	0.00117287	1.21976	up
AT5G14890	AT5G14890	2.06563	2.62477	2.72343	0.78207	0.711352	0.735627	3.06943e-17	-1.60499	down
AT1G53540	AT1G53540	4.38141	14.1929	19.056	3.61874	1.13391	2.12073	0.000286724	-1.44631	down
AT2G15220	AT2G15220	6.73127	6.42565	7.28302	17.0531	23.9444	11.4799	1.15801e-05	1.17645	up
AT1G51470	AT1G51470	0.881503	0.942648	1.2769	3.30959	9.83716	4.73372	7.21417e-09	1.89827	up
AT1G14160	AT1G14160	0.982215	0.456188	1.19689	2.63585	2.82803	1.77478	0.00489949	1.06273	up
Arabidopsis_thaliana_newGene_261	--	1.93646	4.14149	4.22884	8.47897	16.0459	9.39989	6.12818e-05	1.32618	up
AT1G79320	AT1G79320	0.316961	0.390542	0.586756	2.17807	3.07576	2.04065	4.51313e-11	1.9825	up
Arabidopsis_thaliana_newGene_858	--	0.478339	0.794016	0.787447	3.72094	3.6283	2.72632	1.03115e-10	1.86159	up
AT2G23630	AT2G23630	0.392977	0.39008	0.41836	1.91999	5.52599	2.71093	2.3299e-11	2.22207	up
AT3G58150	AT3G58150	1.23956	1.56552	3.55035	0.843081	0.575827	0.502855	0.00769584	-1.09569	down
AT5G56540	AT5G56540	9.57015	4.36674	4.12635	18.1302	60.0917	35.3696	9.68911e-07	1.77726	up
AT3G59900	AT3G59900	7.32658	6.71197	10.2542	12.3953	22.823	22.6451	9.45134e-05	1.07986	up
AT1G54540	AT1G54540	0.829296	1.19062	1.13299	2.51279	3.25433	2.02006	0.000538583	1.0712	up
AT1G50060	AT1G50060	1.01794	1.25651	1.22479	2.99793	19.1134	6.87981	9.85333e-06	1.72298	up
AT5G24313	AT5G24313	0.722465	0.40109	0.432878	1.59807	7.85903	4.31235	8.31762e-06	1.74072	up
AT5G06990	AT5G06990	0.596732	0.544268	0.631319	1.47185	3.47947	2.35263	6.45585e-06	1.52577	up
AT5G20150	AT5G20150	20.1609	19.1314	20.0898	41.37	46.9848	47.5319	1.13217e-26	1.16259	up
AT4G24580	AT4G24580	0.560523	0.371748	0.400335	0.857939	1.74554	1.23196	0.000273981	1.19703	up
AT4G37870	AT4G37870	53.853	57.1977	63.8823	102.934	146.621	133.5	4.91051e-13	1.0808	up
AT1G43800	AT1G43800	0.317915	0.755467	1.40515	1.4977	5.84369	3.90479	0.00218554	1.26881	up
AT1G47600	AT1G47600	0.923823	1.21343	1.07462	2.87518	7.86198	4.43897	3.96742e-08	1.73917	up
AT3G58780	AT3G58780	0.275946	0.303332	1.01606	1.43973	1.90907	2.10761	0.00338242	1.12923	up
AT4G01360	AT4G01360	0.414656	0.087873	0.278409	1.47728	2.82025	0.851585	0.000417906	1.43946	up
AT2G23810	AT2G23810	18.0683	16.4249	23.7583	35.2762	54.862	35.5981	5.70064e-06	1.01209	up
AT2G37440	AT2G37440	0.593781	0.454836	0.580584	1.42532	1.2296	1.04788	0.000496083	1.01215	up
AT5G57530	AT5G57530	1.57275	0.943716	1.64588	6.07201	18.6571	11.854	1.35451e-12	2.31144	up
AT3G44510	AT3G44510	0.329901	0.490192	0.539159	1.51632	2.33105	2.00483	8.25098e-09	1.71073	up
AT3G53720	AT3G53720	10.2384	13.7646	12.26	5.78118	4.07485	6.5616	8.0526e-06	-1.03255	down
AT5G40860	AT5G40860	0.473424	0.432519	0.509984	1.29532	3.79309	2.5235	7.34093e-06	1.63806	up
AT5G11920	AT5G11920	0.213265	0.341754	0.720456	0.855101	4.04096	0.982497	0.00860881	1.13651	up
AT1G51440	AT1G51440	6.22329	8.48932	8.30922	4.24831	0.958731	2.2217	0.00541086	-1.10457	down
AT2G02930	AT2G02930	1.07321	0.873968	1.41737	2.09657	4.37672	2.25276	0.00389104	1.04106	up
AT1G18290	AT1G18290	0.465391	0.422155	0.798054	1.1989	2.57158	1.35134	0.00398756	1.11899	up
AT2G46880	AT2G46880	0.194645	0.247984	0.180162	3.0722	1.82369	3.54203	5.1308e-20	2.8329	up
