# Supplementary material for: PpSAUR5 promotes plant growth by regulating lignin and hormone pathways
Source: Front Plant Sci. 2024 Jun 25;15:1291693. doi: 10.3389/fpls.2024.1291693 (PMC11231374; doi:10.3389/fpls.2024.1291693)
Supplement: Supplementary file 7 [file Table_5.xls]

## Sheet: Sheet1
Supplemental Table S5: The KEGG enriched pathway by the DEGs.
#Kegg_pathway	ko_id	GeneID	KEGG Orthology
Tryptophan metabolism	ko00380	AT1G04180;AT1G04580;AT1G04610;AT1G20620;AT1G47600;AT1G51470;AT3G44300;AT4G28720;AT5G43890	K11816+K22417+K11816+K03781+K01237+K01237+K01501+K11816+K11816
Glycerophospholipid metabolism	ko00564	AT1G51440;AT2G45130;AT3G02040;AT3G11430;AT5G08030;AT5G57190	K16818+K18696+K18696+K13508+K01126+K01613
Starch and sucrose metabolism	ko00500	AT1G19940;AT1G48930;AT1G66270;AT1G66280;AT2G43670;AT2G44450;AT3G08870;AT3G12145;AT3G43190;AT3G55240;AT3G57260;AT4G02290;AT4G11050;AT4G25000;AT4G29690;AT5G06870;AT5G11920;AT5G28510;AT5G65140	K01179+K01179+K01188+K01188+K19891+K01188+K01176+K01188+K00695+K01513+K19891+K01179+K01179+K01176+K01513+K01188+K01193+K01188+K01087
Sulfur metabolism	ko00920	AT2G26695	K13811
Pentose phosphate pathway	ko00030	AT1G13700	K01057
Sesquiterpenoid and triterpenoid biosynthesis	ko00909	AT1G31950;AT1G33750;AT3G29410;AT3G32030;AT4G15340;AT5G42600	K15803+K15803+K15803+K15803+K15823+K16207
Plant hormone signal transduction	ko04075	AT1G16510;AT1G17380;AT1G19050;AT1G27740;AT1G50060;AT1G56150;AT1G59940;AT1G66470;AT1G72870;AT1G75580;AT2G15042;AT2G46970;AT3G09240;AT3G17600;AT3G23240;AT4G07820;AT4G25790;AT4G30320;AT4G32280;AT4G33720;AT4G33730;AT4G34760;AT4G38860;AT5G10720;AT5G10990;AT5G13320;AT5G26010;AT5G47220;AT5G57560;AT5G57625;AT5G58010;AT5G62920;AT5G67060	K14488+K13464+K14492+K12126+K13449+K14488+K14492+K12126+K14497+K14488+K13415+K12126+K14500+K14484+K14516+K13449+K13449+K13449+K14484+K13449+K13449+K14488+K14488+K14489+K14488+K14487+K14497+K14517+K14504+K13449+K12126+K14492+K16189
Ascorbate and aldarate metabolism	ko00053	AT2G46740;AT3G09940;AT4G39830	K00103+K08232+K00423
Phenylalanine metabolism	ko00360	AT2G24850;AT3G43670	K00815+K00276
Alanine, aspartate and glutamate metabolism	ko00250	AT2G02010;AT3G08860;AT3G16150	K01580+K00827+K13051
Biosynthesis of amino acids	ko01230	AT3G03650;AT5G04120	K22846+K15634
Glyoxylate and dicarboxylate metabolism	ko00630	AT1G20620	K03781
Zeatin biosynthesis	ko00908	AT2G36750;AT2G36780	K13496+K13496
Nicotinate and nicotinamide metabolism	ko00760	AT3G55240;AT3G62040;AT4G29690	K01513+K18551+K01513
Vitamin B6 metabolism	ko00750	AT1G17710;AT1G73010	K13248+K13248
Ubiquitin mediated proteolysis	ko04120	AT1G10560;AT4G16260	K10260+K20217
Cysteine and methionine metabolism	ko00270	AT1G12010;AT1G77330;AT2G22810;AT2G24850;AT3G03650;AT3G08860;AT4G11280;AT4G37770	K05933+K05933+K01762+K00815+K22846+K00827+K20772+K01762
Amino sugar and nucleotide sugar metabolism	ko00520	AT2G29620;AT2G43590;AT2G43610;AT3G04720;AT3G12500;AT5G66280	K00770+K01183+K01183+K20547+K20547+K01711
ABC transporters	ko02010	AT1G15210;AT1G71330;AT4G15230;AT5G13580	K08712+K05666+K08712+K05681
Peroxisome	ko04146	AT1G20620;AT4G33790	K03781+K13356
beta-Alanine metabolism	ko00410	AT2G02010;AT3G43670	K01580+K00276
Tyrosine metabolism	ko00350	AT2G24850;AT3G43670	K00815+K00276
2-Oxocarboxylic acid metabolism	ko01210	AT5G23020	K15742
Proteasome	ko03050	AT2G28500	K02725
Protein processing in endoplasmic reticulum	ko04141	AT1G07400;AT1G18830;AT1G24320;AT1G53540;AT2G29500;AT3G12580;AT3G16860;AT3G21660;AT3G46230;AT5G12020;AT5G12030;AT5G16360;AT5G49270;AT5G51440	K13993+K14005+K01228+K13993+K13993+K03283+K10956+K14012+K13993+K13993+K13993+K03283+K10956+K13993
Endocytosis	ko04144	AT1G13340;AT1G32540;AT3G12580;AT3G54870;AT4G14400;AT4G18430;AT4G35985;AT5G16360	K19476+K12191+K03283+K10396+K00889+K07904+K19366+K03283
Valine, leucine and isoleucine degradation	ko00280	AT3G08860;AT3G22750	K00827+K01968
alpha-Linolenic acid metabolism	ko00592	AT1G51440;AT1G72520;AT3G03480;AT3G25780	K16818+K00454+K18858+K10525
Pentose and glucuronate interconversions	ko00040	AT1G02810;AT1G23200;AT1G53830;AT2G27830;AT2G43880;AT2G45220;AT2G47550;AT3G07970;AT3G10710;AT3G43270;AT3G62820;AT4G00080;AT4G22080;AT4G25250;AT5G04960;AT5G04970	K01051+K01051+K01051+K01213+K01184+K01051+K01051+K01184+K01051+K01051+K01051+K01051+K01728+K01051+K01051+K01051
Phosphatidylinositol signaling system	ko04070	AT2G41090;AT3G29000;AT3G47220;AT4G14400;AT5G58670	K02183+K02183+K05857+K00889+K05857
Fatty acid metabolism	ko01212	AT1G43800	K03921
Cutin, suberine and wax biosynthesis	ko00073	AT4G33790;AT5G23190;AT5G41040	K13356+K15402+K15400
Oxidative phosphorylation	ko00190	AT2G07671;AT2G46860;AT3G60330;AT4G01480;Arabidopsis_thaliana_newGene_264	K02128+K01507+K01535+K01507+K01535
Citrate cycle (TCA cycle)	ko00020	AT4G37870	K01610
Glycosphingolipid biosynthesis - globo and isoglobo series	ko00603	AT5G01250	K01988
Pantothenate and CoA biosynthesis	ko00770	AT3G55240;AT4G29690	K01513+K01513
RNA degradation	ko03018	AT3G44260;AT5G06320	K12581+K04077
Phagosome	ko04145	AT3G16860;AT5G49270	K10956+K10956
Ribosome	ko03010	AT5G22460	K02952
Aminoacyl-tRNA biosynthesis	ko00970	AT1G17960;AT2G21100;AT4G34580;AT5G42500;AT5G42510	K01868+K01870+K02433+K01870+K01870
Flavonoid biosynthesis	ko00941	AT4G15390	K13065
Fatty acid biosynthesis	ko00061	AT1G43800	K03921
Isoflavonoid biosynthesis	ko00943	AT1G03495;AT1G03940;AT3G28740	K13264+K13264+K13260
Glycosphingolipid biosynthesis - lacto and neolacto series	ko00601	AT5G01250	K01988
Thiamine metabolism	ko00730	AT5G48940	K22911
Carbon metabolism	ko01200	AT1G13700;AT1G20620;AT4G37870;AT5G04120	K01057+K03781+K01610+K15634
Glutathione metabolism	ko00480	AT1G17170;AT1G27140;AT2G02930;AT3G60550;AT3G62760;AT5G61650	K00799+K00799+K00799+K01255+K00799+K01255
Homologous recombination	ko03440	AT4G11650	K12173
Glucosinolate biosynthesis	ko00966	AT5G23020	K15742
Phenylalanine, tyrosine and tryptophan biosynthesis	ko00400	AT2G24850	K00815
Ubiquinone and other terpenoid-quinone biosynthesis	ko00130	AT2G24850	K00815
Anthocyanin biosynthesis	ko00942	AT2G22930	K17193
Diterpenoid biosynthesis	ko00904	AT1G61120;AT2G47140	K17982+K13070
Biosynthesis of unsaturated fatty acids	ko01040	AT1G43800	K03921
Taurine and hypotaurine metabolism	ko00430	AT2G02010	K01580
Cyanoamino acid metabolism	ko00460	AT1G66270;AT1G66280;AT2G44450;AT3G12145;AT3G16150;AT3G44300;AT5G06870;AT5G28510	K01188+K01188+K01188+K01188+K13051+K01501+K01188+K01188
Pyruvate metabolism	ko00620	AT4G37870	K01610
Carbon fixation in photosynthetic organisms	ko00710	AT4G37870	K01610
Pyrimidine metabolism	ko00240	AT1G14240;AT1G14250;AT3G21520;AT3G55240;AT4G24310;AT4G29690	K01510+K01510+K01510+K01513+K01510+K01513
Stilbenoid, diarylheptanoid and gingerol biosynthesis	ko00945	AT4G15390	K13065
Fructose and mannose metabolism	ko00051	AT1G02310;AT5G66280	K19355+K01711
Glycosylphosphatidylinositol (GPI)-anchor biosynthesis	ko00563	AT1G74670	K03860
Nitrogen metabolism	ko00910	AT3G44300	K01501
Inositol phosphate metabolism	ko00562	AT2G37440;AT3G47220;AT4G14400;AT5G58670	K24221+K05857+K00889+K05857
Glycerolipid metabolism	ko00561	AT1G54020;AT2G11810;AT2G19060;AT3G11430;AT5G45960	K00679+K03715+K00679+K13508+K00679
Porphyrin and chlorophyll metabolism	ko00860	AT1G26360;AT1G69240	K13544+K13544
Glycolysis / Gluconeogenesis	ko00010	AT3G01260;AT4G37870;AT5G01330;AT5G04120	K01785+K01610+K01568+K15634
Flavone and flavonol biosynthesis	ko00944	AT1G03495;AT1G03940	K13264+K13264
Ribosome biogenesis in eukaryotes	ko03008	AT1G80240;AT2G41800	K03097+K03097
Riboflavin metabolism	ko00740	AT2G01880;AT3G55240;AT4G29690	K14379+K01513+K01513
RNA transport	ko03013	AT1G53870;AT1G64110;AT3G05890	K03239+K03231+K03260
Tropane, piperidine and pyridine alkaloid biosynthesis	ko00960	AT2G24850;AT2G29330;AT3G43670	K00815+K08081+K00276
Plant-pathogen interaction	ko04626	AT1G09090;AT1G15890;AT1G18400;AT1G19230;AT1G50060;AT1G51880;AT1G52660;AT2G16750;AT2G24610;AT2G32140;AT2G32680;AT2G33580;AT2G38470;AT2G41090;AT2G41970;AT3G07070;AT3G07490;AT3G10660;AT3G23120;AT3G29000;AT3G56400;AT4G07820;AT4G23810;AT4G25790;AT4G29180;AT4G30320;AT4G33720;AT4G33730;AT4G37010;AT5G07100;AT5G12940;AT5G16900;AT5G27060;AT5G45210;AT5G51060;AT5G57625;AT5G60900;Arabidopsis_thaliana_newGene_…	K13447+K13459+K18878+K13447+K13449+K16224+K13459+K13430+K05391+K16226+K13466+K13429+K13424+K02183+K13436+K13430+K13448+K13412+K13466+K02183+K16225+K13449+K13459+K13449+K16224+K13449+K13449+K13449+K13448+K13424+K13466+K16224+K13466+K16225+K13447+K13449+K13417+K16224
Spliceosome	ko03040	AT1G62440;AT2G46880;AT3G01950;AT3G12580;AT3G54770;AT4G16680;AT5G16360	K12820+K12867+K11094+K03283+K12741+K12813+K03283
Linoleic acid metabolism	ko00591	AT1G72520	K00454
Protein export	ko03060	AT3G16860;AT5G49270	K10956+K10956
MAPK signaling pathway - plant	ko04016	AT1G09090;AT1G19230;AT1G20620;AT1G50060;AT1G51880;AT1G72870;AT1G73500;AT2G26010;AT2G26020;AT2G38470;AT2G41090;AT3G04720;AT3G12500;AT3G23240;AT3G29000;AT4G07820;AT4G11280;AT4G25790;AT4G29180;AT4G30320;AT4G33720;AT4G33730;AT5G07100;AT5G16900;AT5G24780;AT5G26010;AT5G44420;AT5G44430;AT5G51060;AT5G57625;Arabidopsis_thaliana_newGene_987	K13447+K13447+K03781+K13449+K16224+K14497+K20604+K20727+K20727+K13424+K02183+K20547+K20547+K14516+K02183+K13449+K20772+K13449+K16224+K13449+K13449+K13449+K13424+K16224+K20728+K14497+K20727+K20727+K13447+K13449+K16224
Isoquinoline alkaloid biosynthesis	ko00950	AT1G49390;AT2G24850;AT3G43670	K14975+K00815+K00276
Monobactam biosynthesis	ko00261	AT2G26695	K13811
Butanoate metabolism	ko00650	AT2G02010	K01580
Monoterpenoid biosynthesis	ko00902	AT3G25820	K07385
SNARE interactions in vesicular transport	ko04130	AT3G52400	K08486
Phenylpropanoid biosynthesis	ko00940	AT1G05240;AT1G05250;AT1G05260;AT1G30870;AT1G34510;AT1G44970;AT1G49570;AT1G66270;AT1G66280;AT1G68850;AT2G18150;AT2G37130;AT2G39040;AT2G39420;AT2G44450;AT3G01190;AT3G12145;AT3G17070;AT3G21770;AT3G49960;AT4G15390;AT4G26010;AT4G30170;AT4G36430;AT5G06720;AT5G06730;AT5G06870;AT5G14130;AT5G15180;AT5G17820;AT5G19890;AT5G22410;AT5G26310;AT5G28510;AT5G42180;AT5G47000;AT5G64100;AT5G66390;AT5G67400;Arabidops…	K00430+K00430+K00430+K00430+K00430+K00430+K00430+K01188+K01188+K00430+K00430+K00430+K00430+K18368+K01188+K00430+K01188+K00430+K00430+K00430+K13065+K00430+K00430+K00430+K00430+K00430+K01188+K00430+K00430+K00430+K00430+K00430+K12356+K01188+K00430+K00430+K00430+K00430+K00430+K00430
Brassinosteroid biosynthesis	ko00905	AT1G73340	K09587
Selenocompound metabolism	ko00450	AT2G26695;AT5G39110;AT5G39120;AT5G39150;AT5G39180	K13811+K00384+K00384+K00384+K00384
Carotenoid biosynthesis	ko00906	AT2G29090	K09843
Circadian rhythm - plant	ko04712	AT1G26790;AT1G27740;AT1G49130;AT1G66470;AT1G80240;AT2G41800;AT2G46970;AT5G58010	K16222+K12126+K12128+K12126+K03097+K03097+K12126+K12126
Purine metabolism	ko00230	AT1G14240;AT1G14250;AT2G26695;AT3G21520;AT3G55240;AT4G24310;AT4G29690	K01510+K01510+K13811+K01510+K01513+K01510+K01513
Glycine, serine and threonine metabolism	ko00260	AT3G08860;AT3G43670;AT5G04120	K00827+K00276+K15634
N-Glycan biosynthesis	ko00510	AT1G24320	K01228
Other types of O-glycan biosynthesis	ko00514	AT2G25260	K20782
Galactose metabolism	ko00052	AT3G01260;AT3G57520;AT5G11920	K01785+K06617+K01193
