# Supplementary material for: PpSAUR5 promotes plant growth by regulating lignin and hormone pathways
Source: Front Plant Sci. 2024 Jun 25;15:1291693. doi: 10.3389/fpls.2024.1291693 (PMC11231374; doi:10.3389/fpls.2024.1291693)
Supplement: Supplementary file 8 [file Table_6.xls]

## Sheet: Sheet1
Supplemental Table S6: DEGs information of phenylalanine metabolic pathway
pathway_ID	KO_ID	geneID	NR_description	FDR	log2FC	regulated
ko00940	K00430	AT1G34510	Peroxidase superfamily protein	4.42111e-12	2.42299	up
ko00940	K00430	AT5G64100	Peroxidase superfamily protein	0.00012624	1.26831	up
ko00940	K00430	AT5G42180	Peroxidase superfamily protein	0.000113111	1.23616	up
ko00940	K01188	AT5G28510	beta glucosidase 24	9.657e-17	2.22353	up
ko00940	K00430	AT3G01190	Peroxidase superfamily protein	0.00100433	1.09027	up
ko00940	K00430	AT3G17070	Peroxidase family protein	9.81761e-09	-1.57421	down
ko00940	K00430	Arabidopsis_thaliana_newGene_696	Similar to gb|X98322 peroxidase (prxr10) from Arabidopsis thaliana	5.45663e-09	2.16692	up
ko00940	K00430	AT4G30170	Peroxidase family protein	2.15032e-08	1.72966	up
ko00940	K13065	AT4G15390	HXXXD-type acyl-transferase family protein	7.61221e-05	1.09567	up
ko00940	K01188	AT5G06870	polygalacturonase inhibiting protein 2	3.68434e-10	1.20934	up
ko00940	K00430	AT5G15180	Peroxidase superfamily protein	2.40632e-14	1.72883	up
ko00940	K00430	AT5G19890	Peroxidase superfamily protein	1.75227e-12	2.4075	up
ko00940	K12356	AT5G26310	UDP-Glycosyltransferase superfamily protein	0.000177285	1.27636	up
ko00940	K01188	AT2G44450	beta glucosidase 15	0.00291398	1.1443	up
ko00940	K00430	AT3G21770	Peroxidase superfamily protein	0.00101066	1.08052	up
ko00940	K00430	AT2G37130	Peroxidase superfamily protein	3.15774e-11	1.20192	up
ko00940	K00430	AT5G06720	peroxidase 2	1.82306e-17	2.81017	up
ko00940	K00430	AT5G17820	Peroxidase superfamily protein	1.80358e-09	1.93752	up
ko00940	K00430	AT1G68850	Peroxidase superfamily protein	0.000534095	1.18408	up
ko00940	K00430	AT1G05260	Peroxidase superfamily protein	8.81699e-08	1.42619	up
ko00940	K00430	AT4G36430	Peroxidase superfamily protein	0.000797097	1.11016	up
ko00940	K00430	AT5G47000	Peroxidase superfamily protein	9.92124e-08	-1.34245	down
ko00940	K00430	AT5G14130	Peroxidase superfamily protein	2.18282e-06	1.23567	up
ko00940	K00430	AT2G18150	Peroxidase superfamily protein	9.13194e-06	1.44087	up
ko00940	K18368	AT2G39420	alpha/beta-Hydrolases superfamily protein	1.7646e-07	1.05567	up
ko00940	K00430	AT5G66390	Peroxidase superfamily protein	1.12971e-05	1.15846	up
ko00940	K01188	AT1G66270	Glycosyl hydrolase superfamily protein	0.00282795	1.26247	up
ko00940	K00430	AT1G44970	Peroxidase superfamily protein	6.51331e-05	1.40526	up
ko00940	K01188	AT3G12145	Leucine-rich repeat (LRR) family protein	4.15271e-05	1.14637	up
ko00940	K00430	AT5G22410	root hair specific 18	1.18186e-10	2.22848	up
ko00940	K00430	AT3G49960	Peroxidase superfamily protein	3.26514e-17	2.63164	up
ko00940	K00430	AT4G26010	Peroxidase superfamily protein	3.54091e-09	2.03135	up
ko00940	K00430	AT1G30870	Peroxidase superfamily protein	1.36744e-10	2.05362	up
ko00940	K00430	AT1G05240	Peroxidase superfamily protein	0.000500944	1.4324	up
ko00940	K00430	AT1G49570	Peroxidase superfamily protein	1.82293e-08	1.9349	up
ko00940	K00430	AT2G39040	Peroxidase superfamily protein	9.17298e-07	1.80348	up
ko00940	K00430	AT1G05250	Peroxidase superfamily protein	0.0043624	1.21661	up
ko00940	K00430	AT5G06730	Peroxidase superfamily protein	1.06457e-07	1.68773	up
ko00940	K00430	AT5G67400	root hair specific 19	4.1195e-08	1.94964	up
ko00940	K01188	AT1G66280	Glycosyl hydrolase superfamily protein	0.00234458	1.0723	up
