# Supplementary material for: PpSAUR5 promotes plant growth by regulating lignin and hormone pathways
Source: Front Plant Sci. 2024 Jun 25;15:1291693. doi: 10.3389/fpls.2024.1291693 (PMC11231374; doi:10.3389/fpls.2024.1291693)
Supplement: Supplementary file 9 [file Table_7.xls]

## Sheet: 生长素
Supplemental Table S7: DEGs information of plant hormone signal transduction pathway
DEGs related to auxin biosynthesis
pathway_ID	KO_ID	geneID	NR_description	FDR	log2FC	regulated
ko04075	K14488	AT1G16510	SAUR-like auxin-responsive protein family [Arabidopsis thaliana]	4.11e-13	-1.54876	down
ko04075	K14484	AT4G32280	indole-3-acetic acid inducible 29 [Arabidopsis thaliana]	1.59e-05	1.40778	up
ko04075	K14488	AT1G75580	SAUR-like auxin-responsive protein family [Arabidopsis thaliana]	8.52e-18	-2.32561	down
ko04075	K14488	AT1G56150	SAUR-like auxin-responsive protein family [Arabidopsis thaliana]	0.0024245	-1.27807	down
ko04075	K14488	AT4G34760	SAUR-like auxin-responsive protein family [Arabidopsis thaliana]	3.24e-05	-1.12789	down
ko04075	K14488	AT4G38860	SAUR-like auxin-responsive protein family [Arabidopsis thaliana]	2.39e-09	-1.74378	down
ko04075	K14484	AT3G17600	indole-3-acetic acid inducible 31 [Arabidopsis thaliana]	0.00194544	1.22915	up
ko04075	K14488	AT5G10990	SAUR-like auxin-responsive protein family [Arabidopsis thaliana]	0.0010749	1.28124	up
ko04075	K14487	AT5G13320	Auxin-responsive GH3 family protein [Arabidopsis thaliana]	0.00456727	1.12683	up
DEGs related to gibberellin biosynthesis
pathway_ID	KO_ID	geneID	NR_description	FDR	log2FC	regulated
ko04075	K12126	AT5G58010	LJRHL1-like 3 [Arabidopsis thaliana]	2.68e-07	1.79158	up
ko04075	K12126	AT2G46970	phytochrome interacting factor 3-like 1 [Arabidopsis thaliana]	3.61e-08	1.82821	up
ko04075	K12126	AT1G27740	root hair defective 6-like 4 [Arabidopsis thaliana]	1.5e-08	2.03746	up
ko04075	K16189	AT5G67060	basic helix-loop-helix (bHLH) DNA-binding superfamily protein [Arabidopsis thaliana]	1.75e-05	1.24261	up
ko04075	K12126	AT1G66470	unnamed protein product [Arabidopsis thaliana]	0.00127611	1.2156	up
